# Supplementary material for: Levels of human proteins in plasma associated with acute paediatric malaria
Source: Springer Nature journal article supplement (doi:10.1186/s12936-018-2576-y), 2018-11-15

# Additional file 8. Information about proteins discriminating between controls and malaria patients

## ADSSL1

Adenylosuccinate synthase like 1  
Antibody: HPA052621

Intensities per sample group

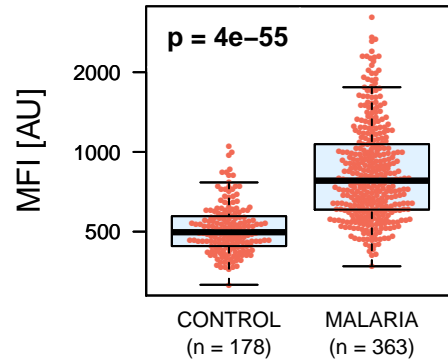

Correlation between experiments

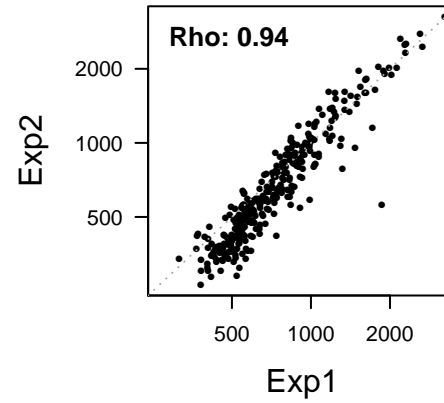

Control vs malaria cases

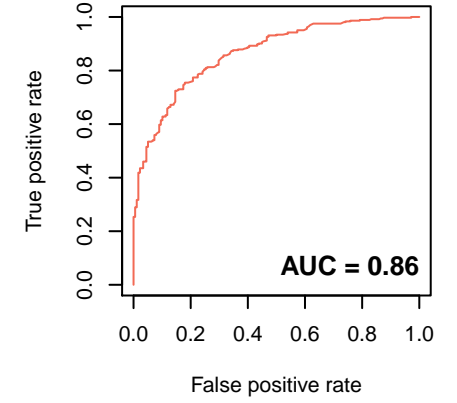

Intensities per sample group

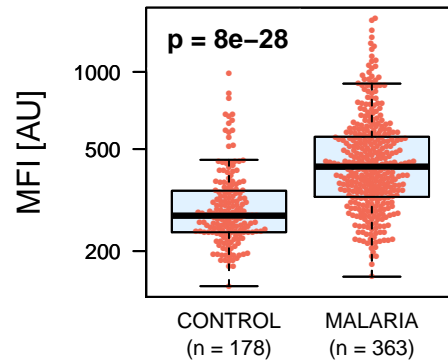

Correlation between experiments

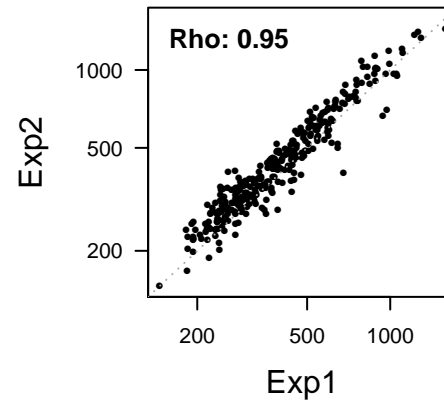

Control vs malaria cases

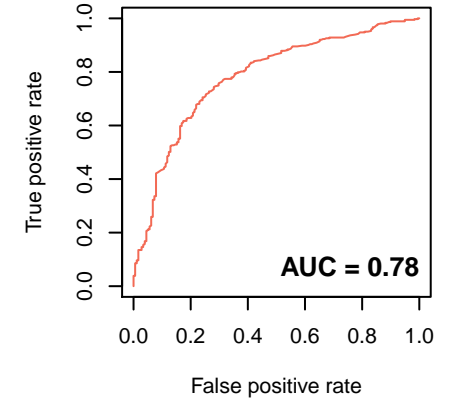

Intensities per sample group

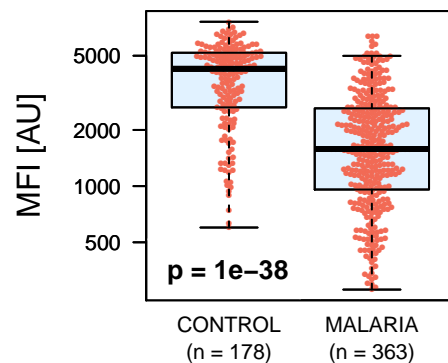

Correlation between experiments

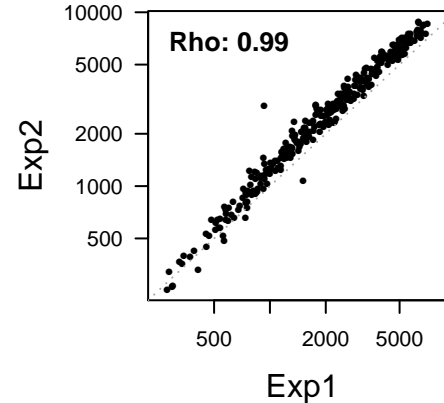

Control vs malaria cases

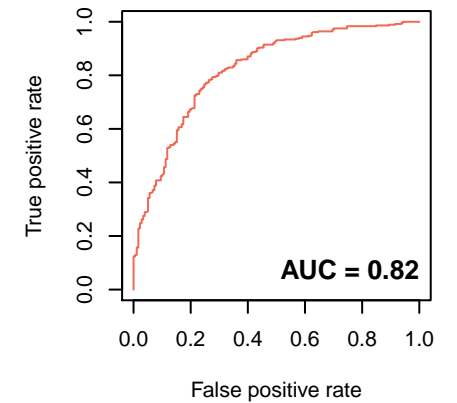

Intensities per sample group

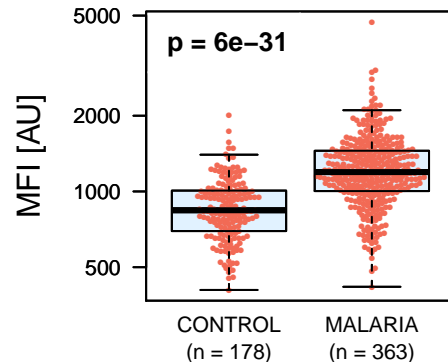

Correlation between experiments

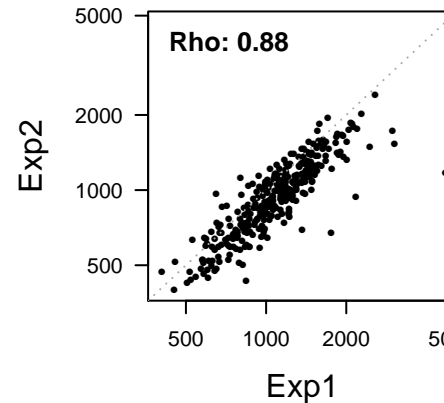

Control vs malaria cases

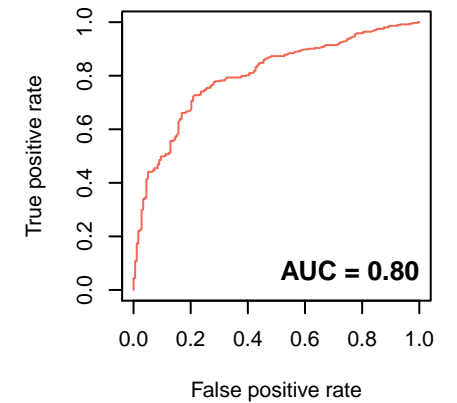

Intensities per sample group

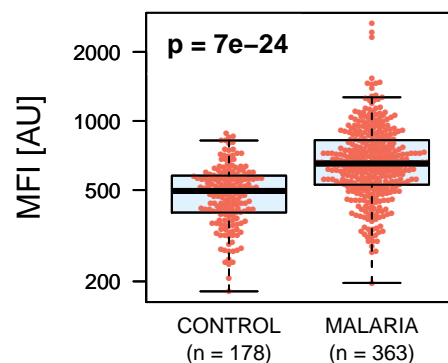

Correlation between experiments

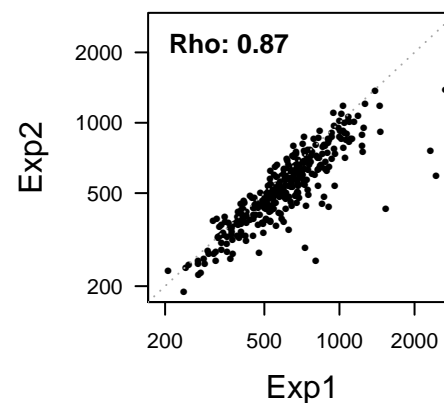

Control vs malaria cases

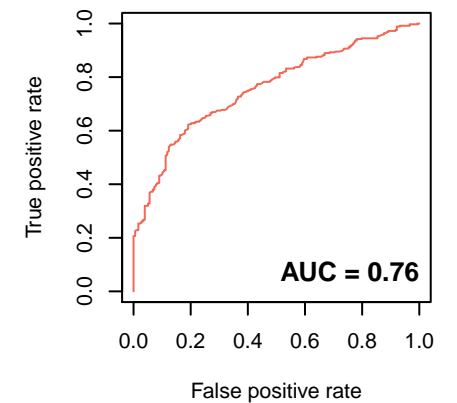

## CD80

CD80 molecule  
Antibody: HPA039851

# CEBPA

CCAAT/enhancer binding protein alpha  
Antibody: HPA052734

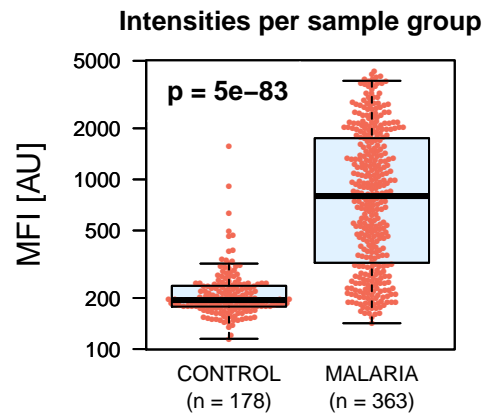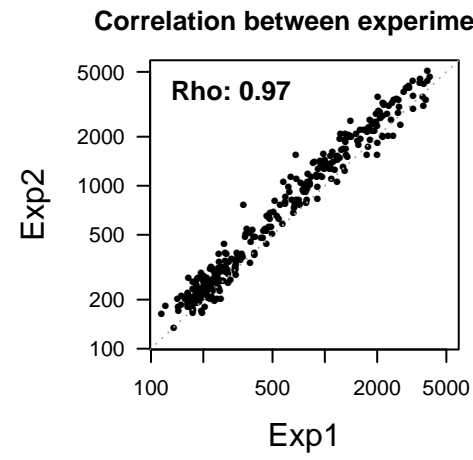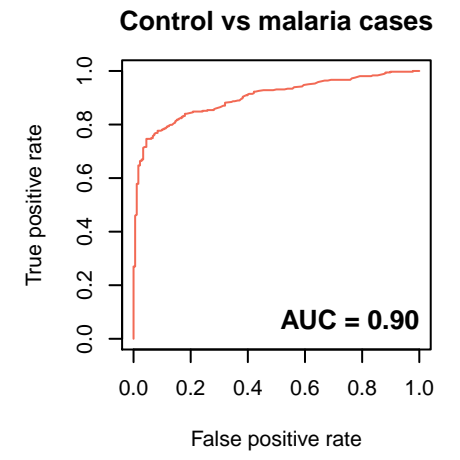

# CRP

C-reactive protein  
Antibody: HPA027396

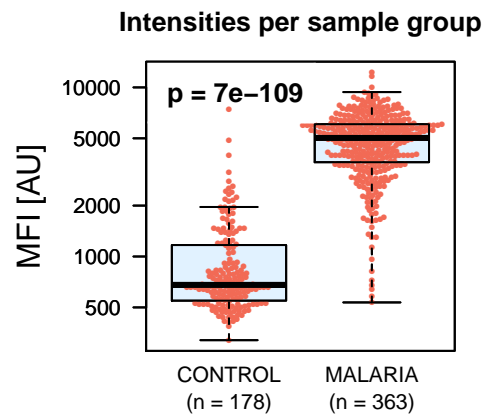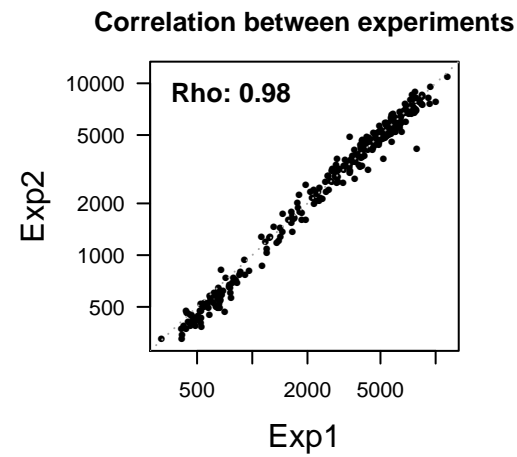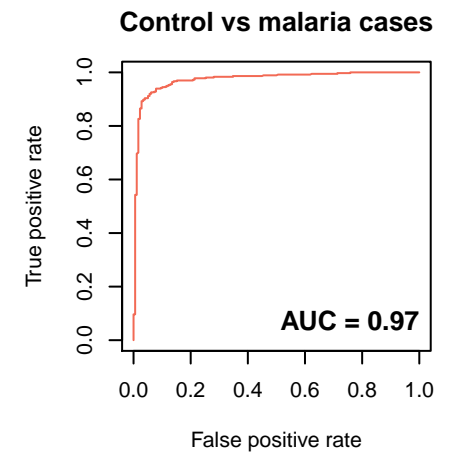

# CSF1

Colony stimulating factor 1  
Antibody: HPA061864

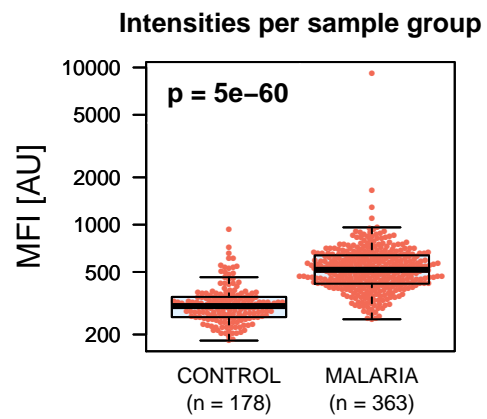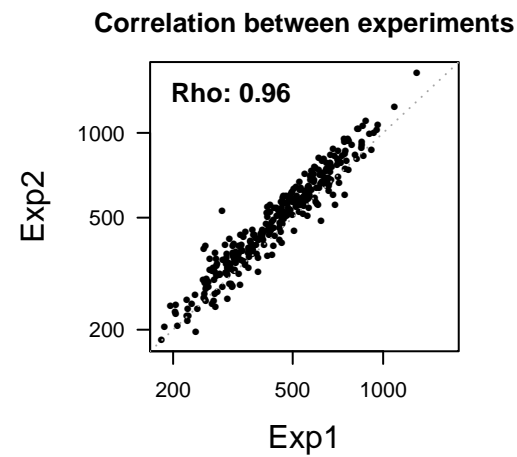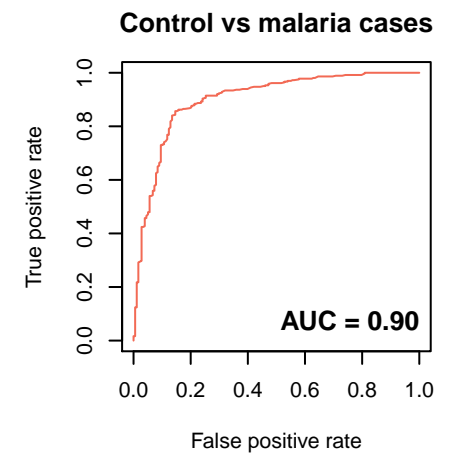

# CTSD

Cathepsin D  
Antibody: HPA003001

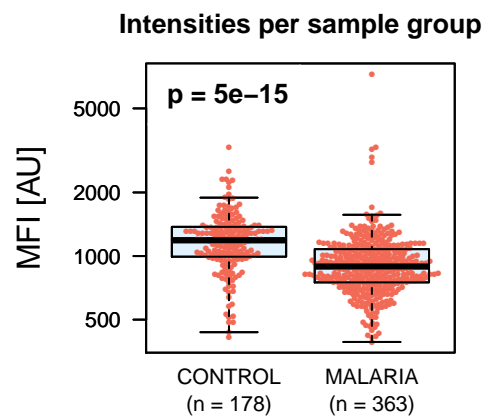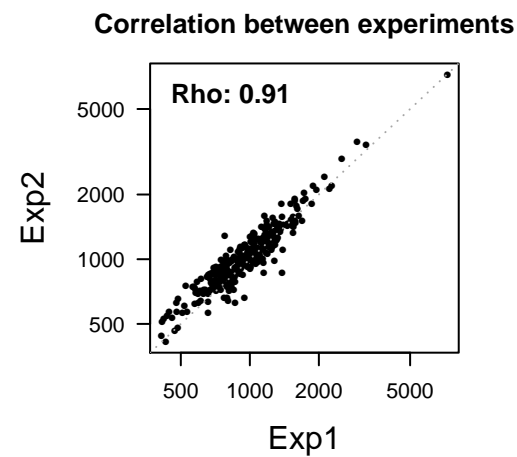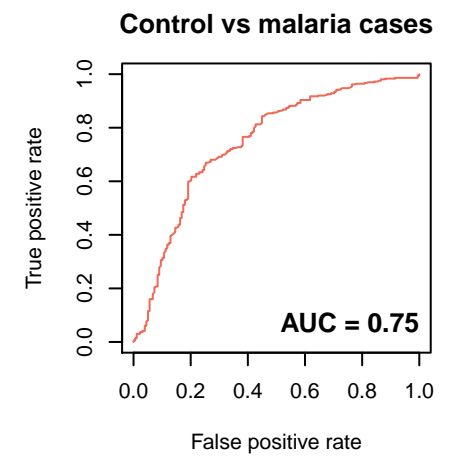

# EPB41L2

Erythrocyte membrane protein band 4.1 like 2  
Antibody: HPA006642

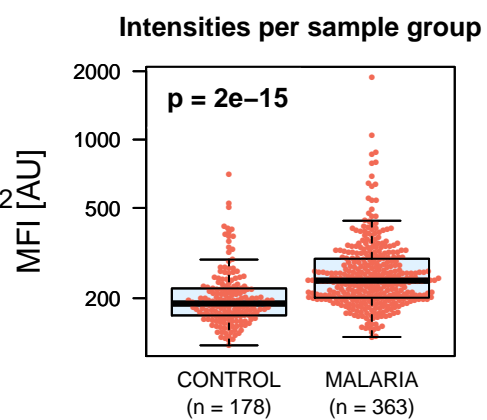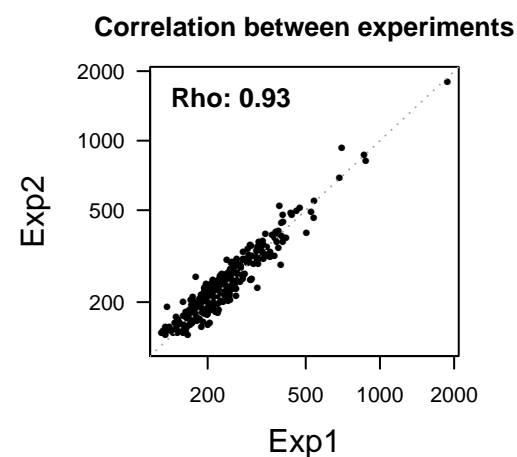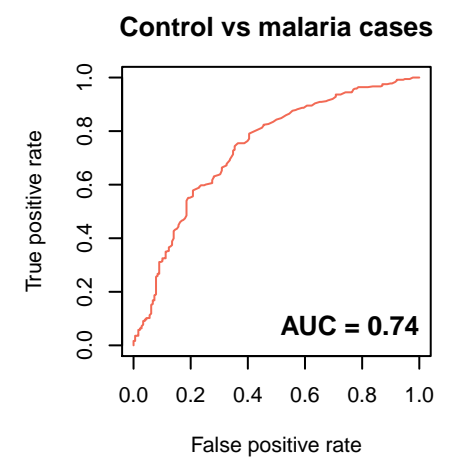

# GYPC

Glycophorin C (Gerbich blood group)  
Antibody: HPA008965

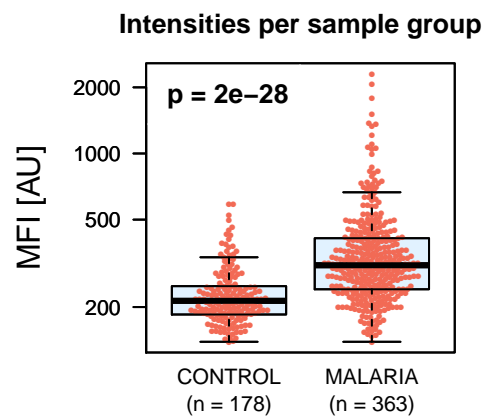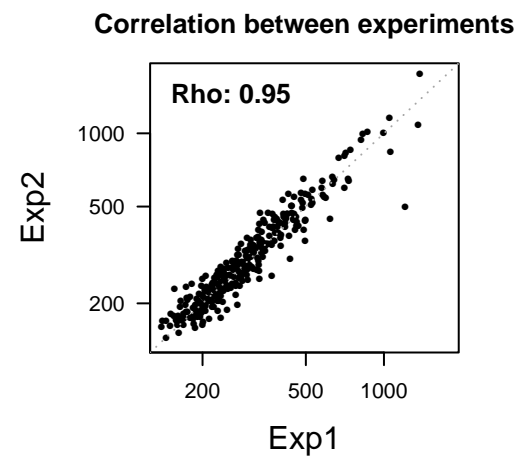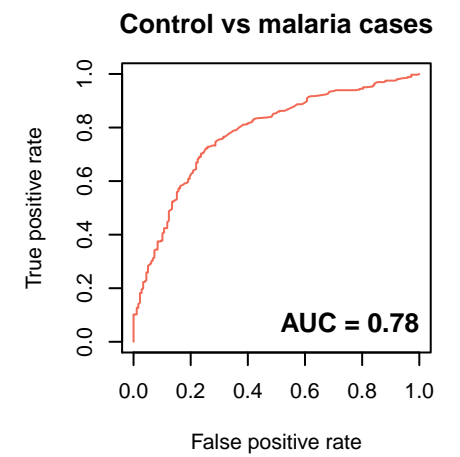

# IGFBP1

Insulin like growth factor binding protein 1  
Antibody: MAB675 R&D

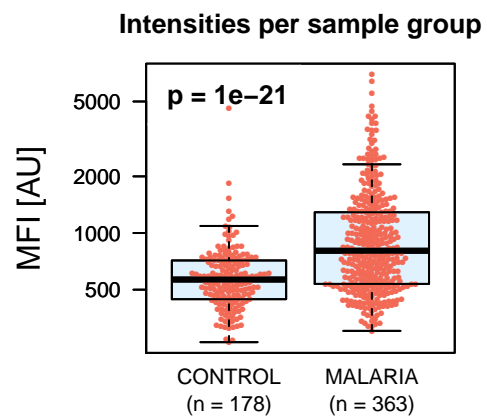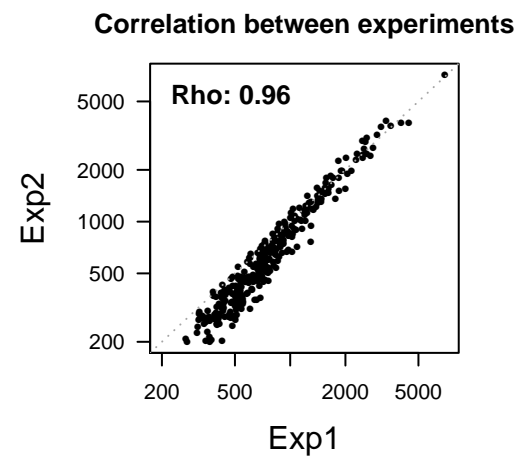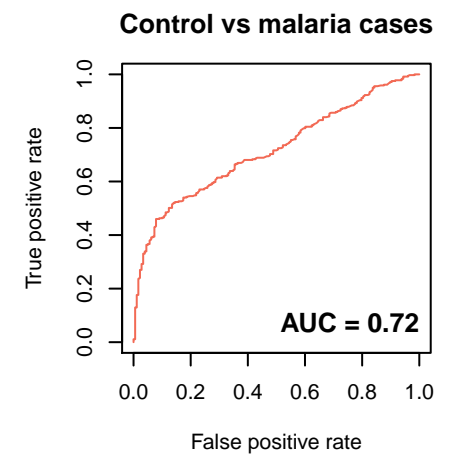

# ITGAV

Integrin subunit alpha V  
Antibody: HPA004856

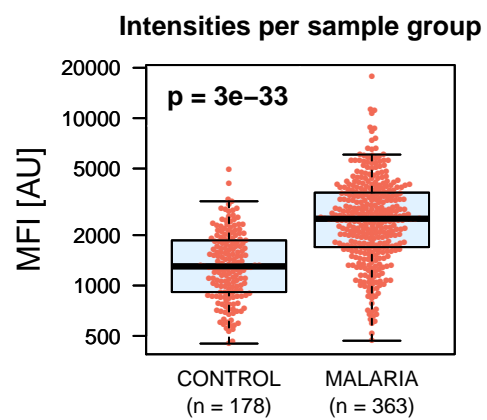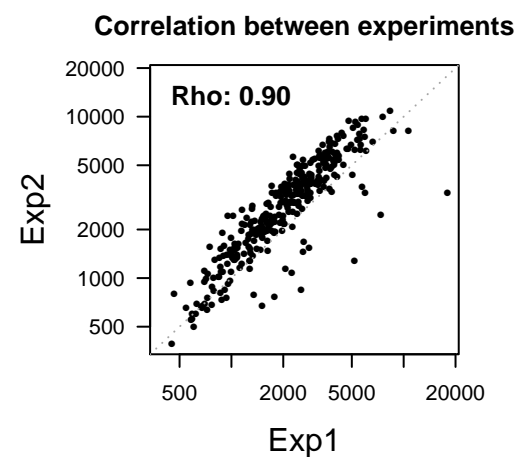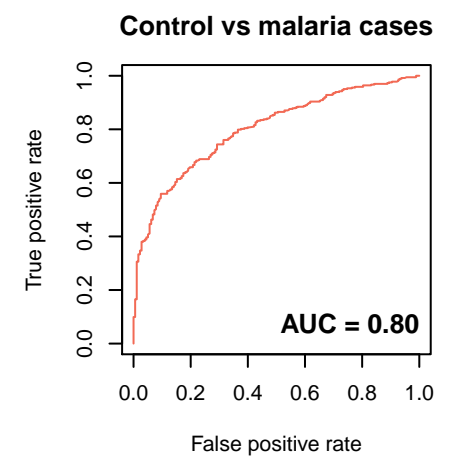

# LBP

Lipopolysaccharide binding protein  
Antibody: HPA001508

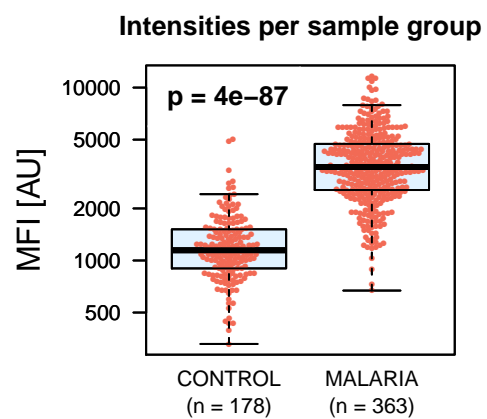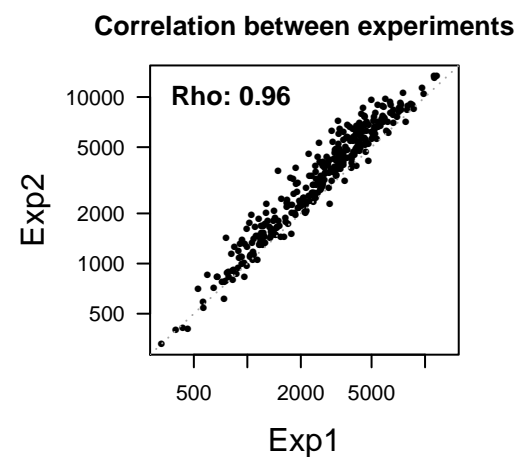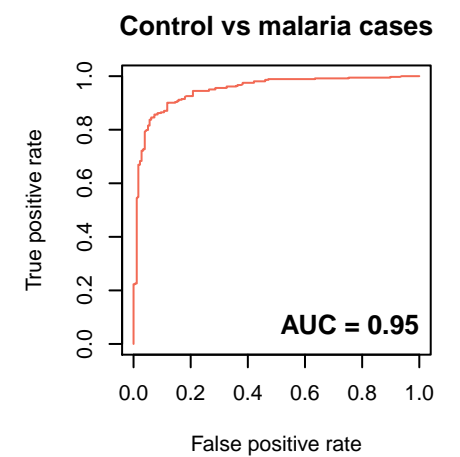

# LCP1

Lymphocyte cytosolic protein 1  
Antibody: HPA019493

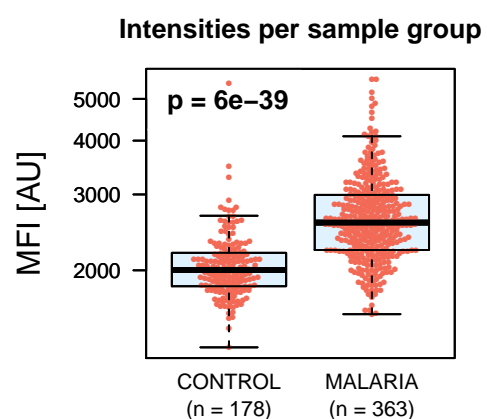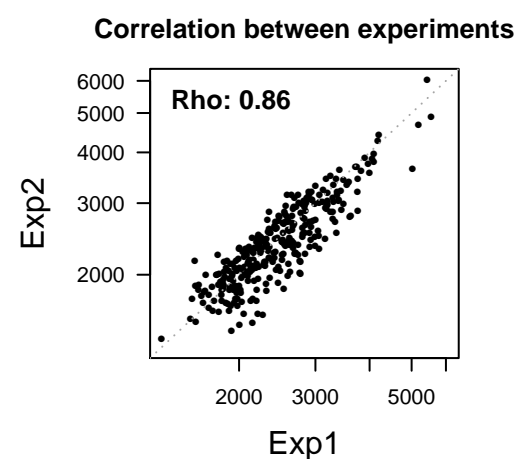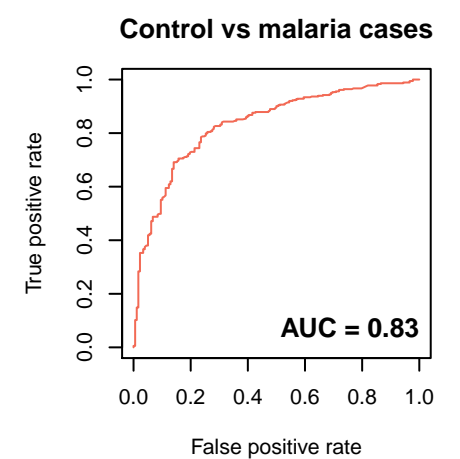

# MMP2

Matrix metallopeptidase 2  
Antibody: HPA001939

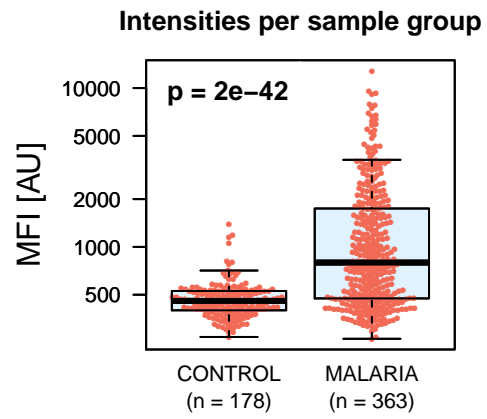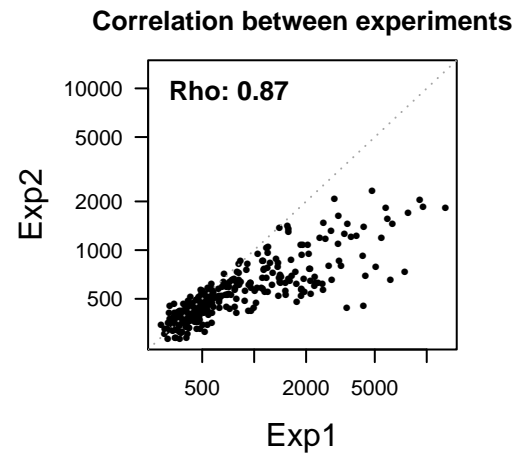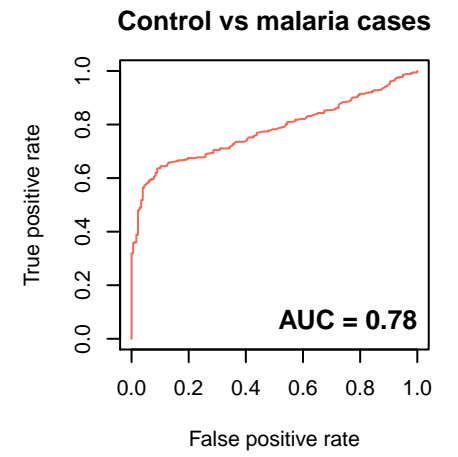

# MYL3

Myosin light chain 3  
Antibody: HPA016564

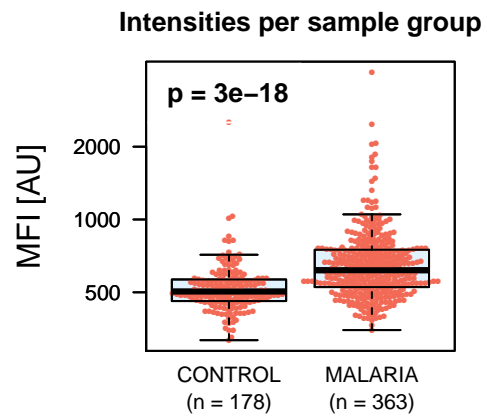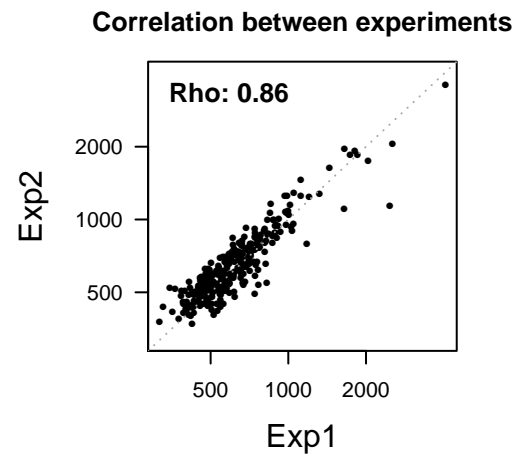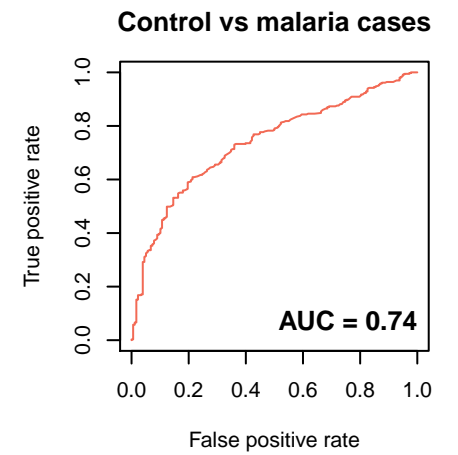

# NEFM

Neurofilament medium  
Antibody: HPA022845

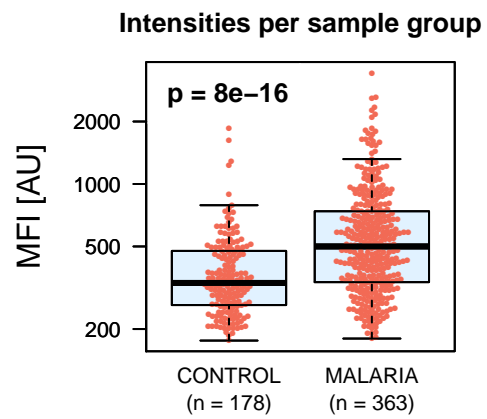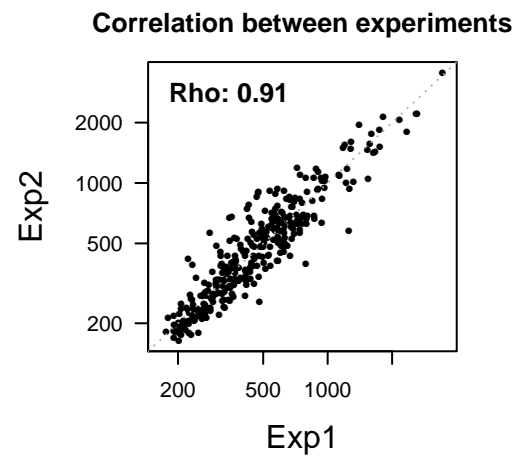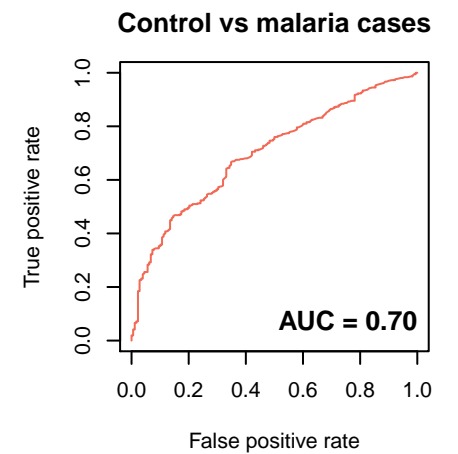

# ORM1/2

Orosomucoid 1/2  
Antibody: HPA047725

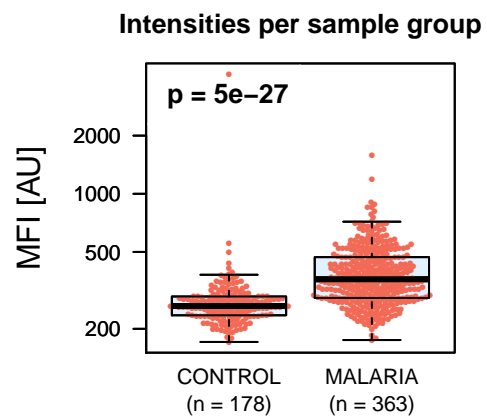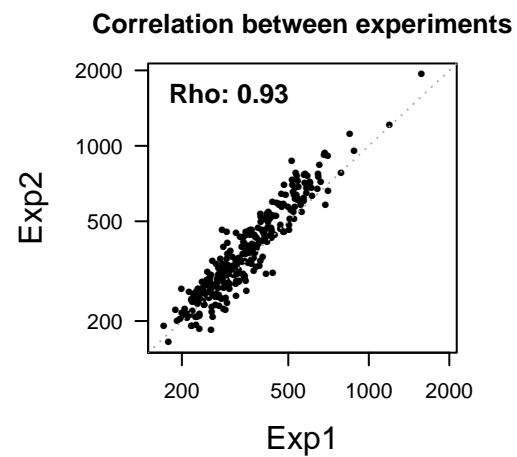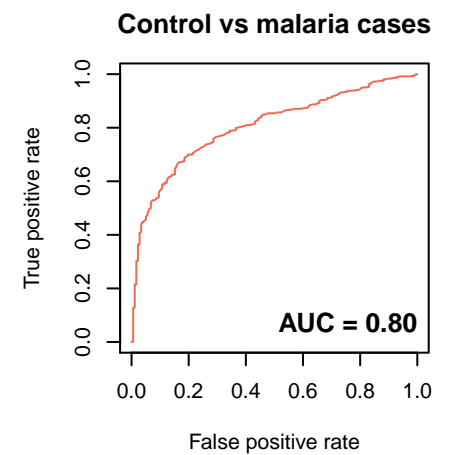

# RIPK2

Receptor interacting serine/threonine kinase 2  
Antibody: HPA016499

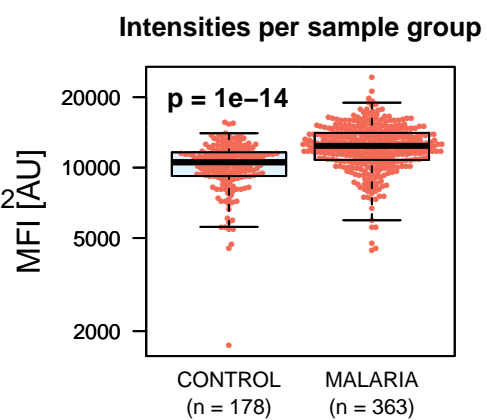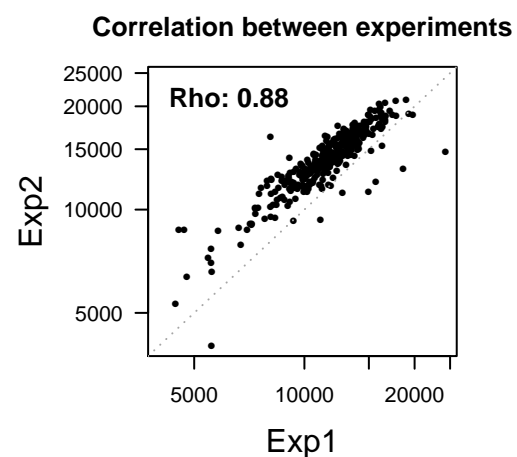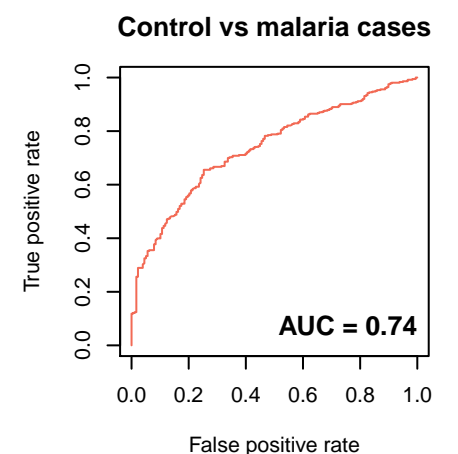

# SERPINA3

Serpin family A member 3  
Antibody: HPA002560

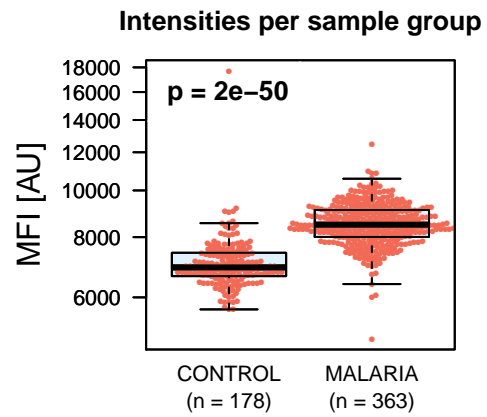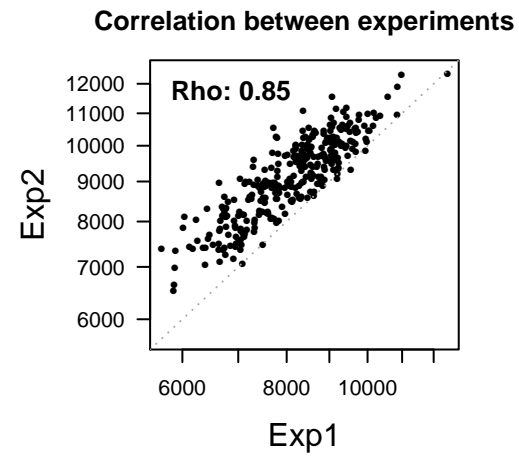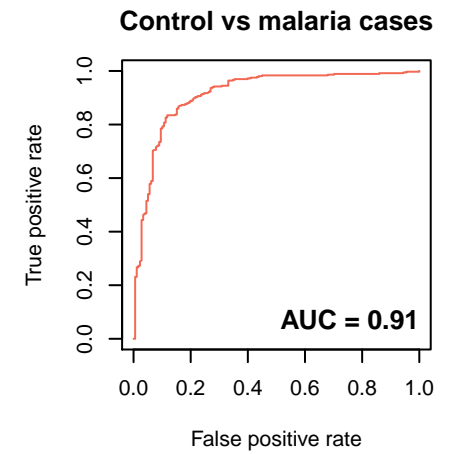

# SPARC

Secreted protein acidic and cysteine rich  
Antibody: HPA003020

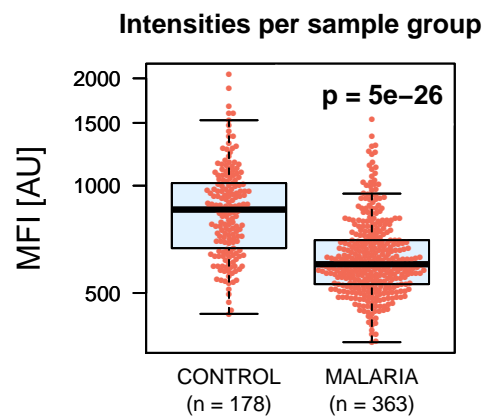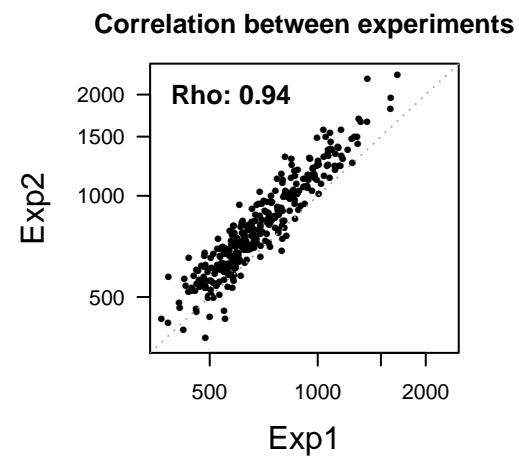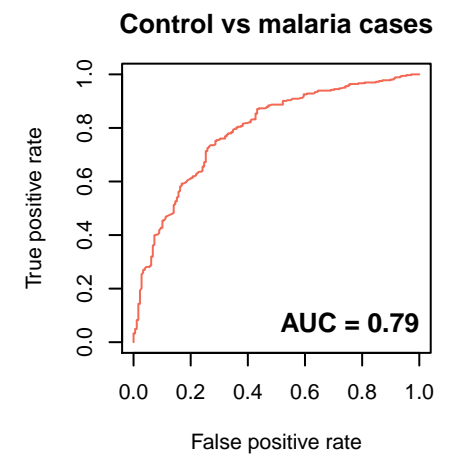

# TIPIN

TIMELESS interacting protein  
Antibody: HPA039704

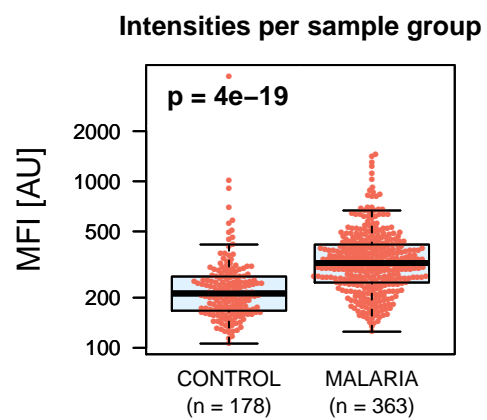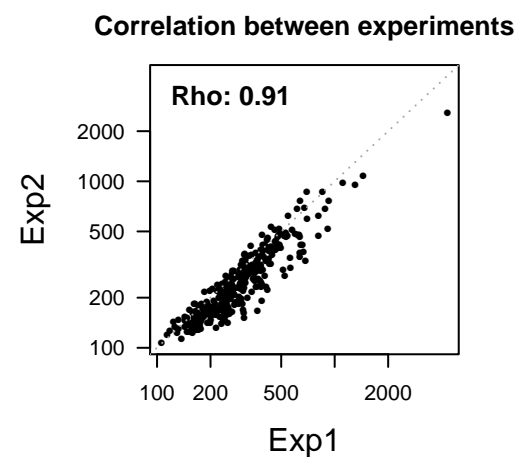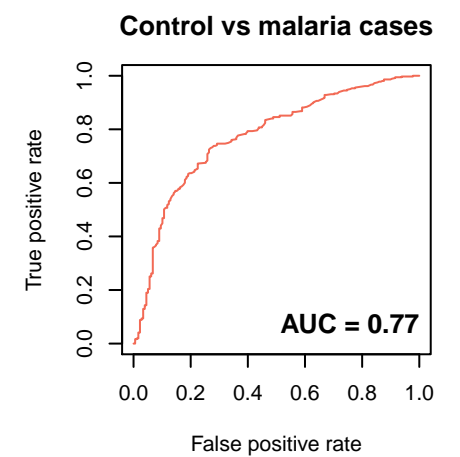

# TNF

Tumor necrosis factor  
Antibody: HPA077901

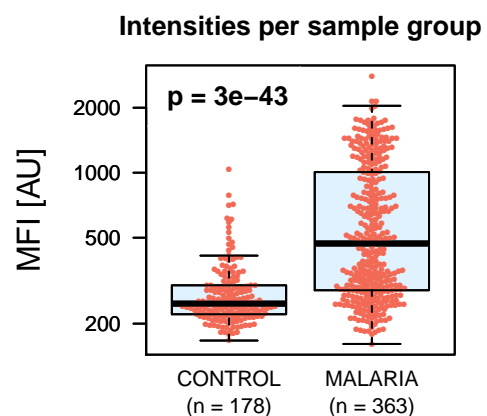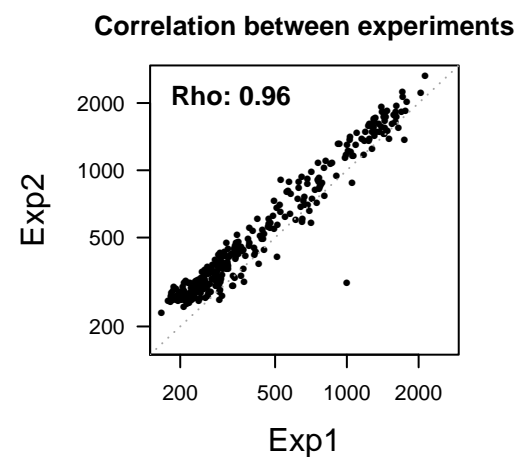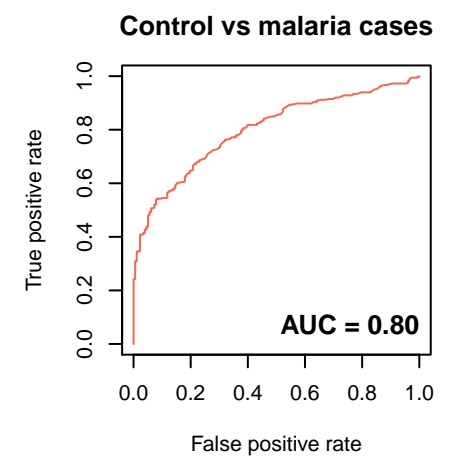

# VCAM1

Vascular cell adhesion molecule 1  
Antibody: HPA001618

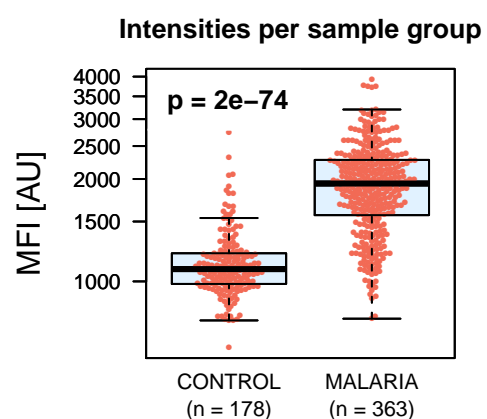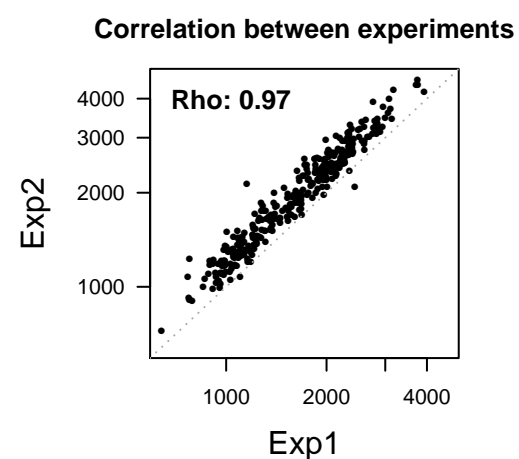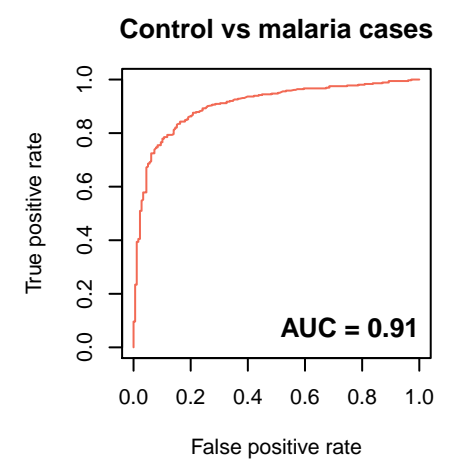

# VWF

von Willebrand factor  
Antibody: HPA002082

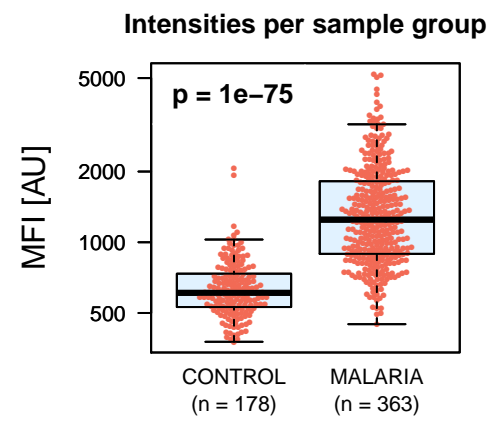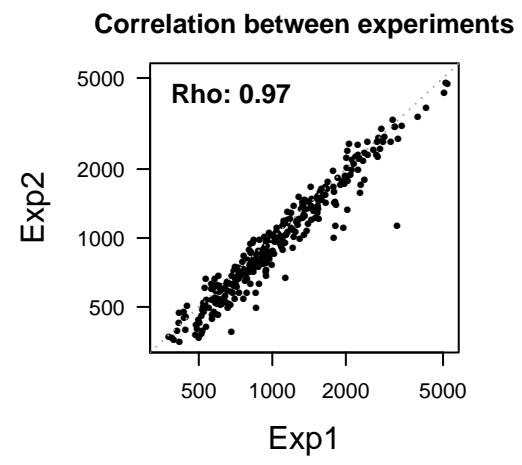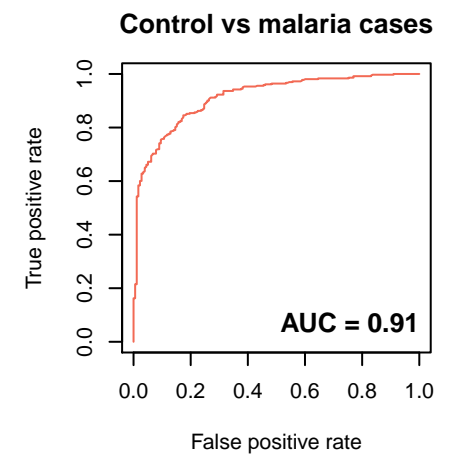

Supplement: MOESM8 [file 16273274]
