# Supplementary material for: Levels of human proteins in plasma associated with acute paediatric malaria
Source: Springer Nature journal article supplement (doi:10.1186/s12936-018-2576-y), 2018-11-15

# Additional file 9. Information about proteins with divergent levels between mild and severe malaria patients

## ADAMTS13

ADAM metallopeptidase w. thrombospondin type 1 motif 13  
Antibody: HPA042014

Intensities per sample group

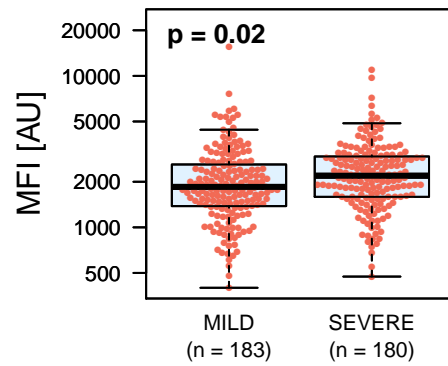

Correlation between experiments

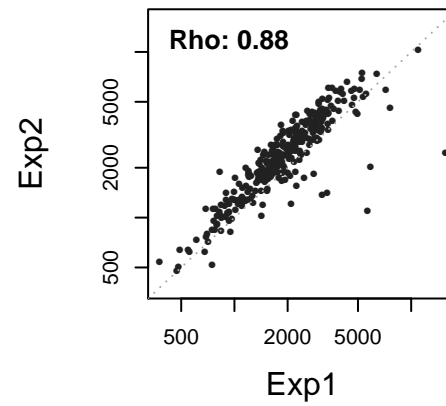

Only samples without dehydration

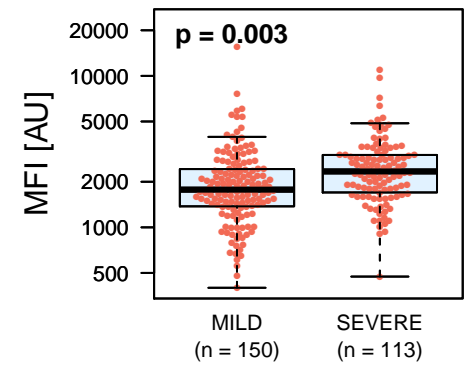

Intensities per sample group

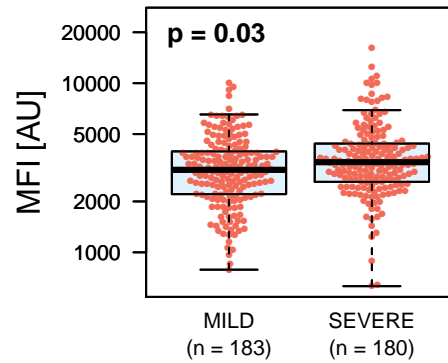

Correlation between experiments

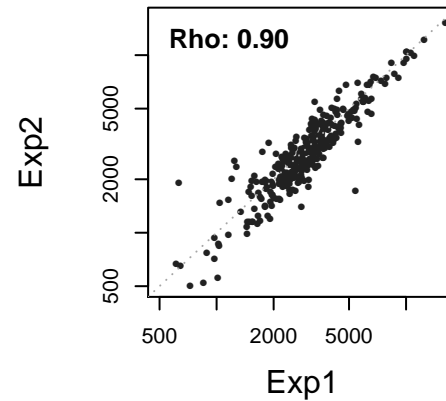

Only samples without dehydration

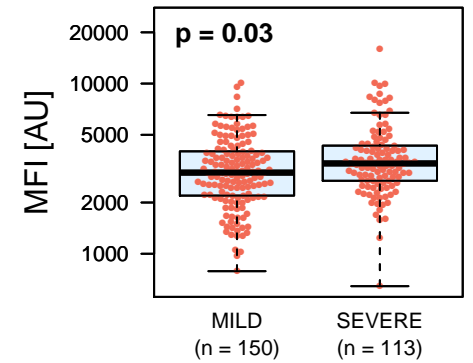

## AGT

Angiotensinogen  
Antibody: MAB3156 R&D

Intensities per sample group

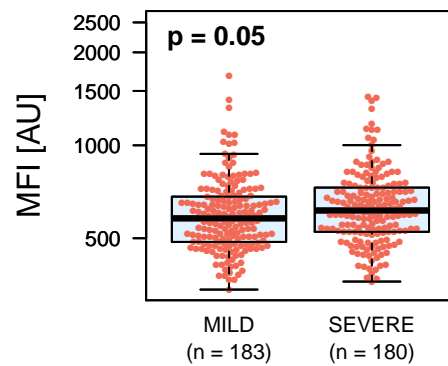

Correlation between experiments

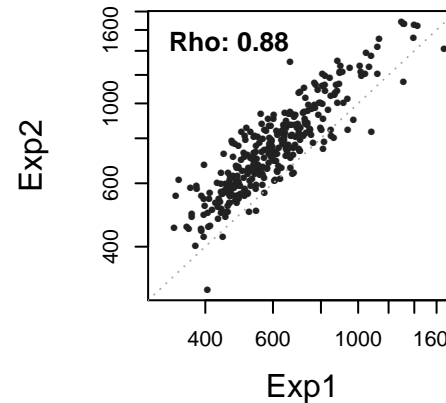

Only samples without dehydration

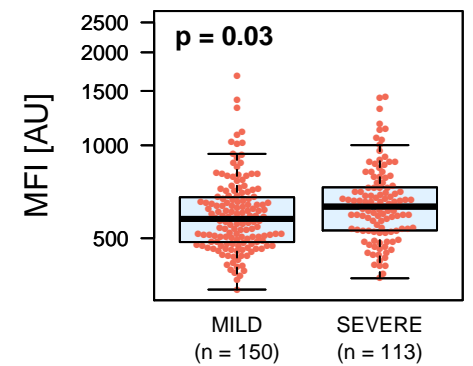

## ANK1

Ankyrin 1  
Antibody: HPA004842

Intensities per sample group

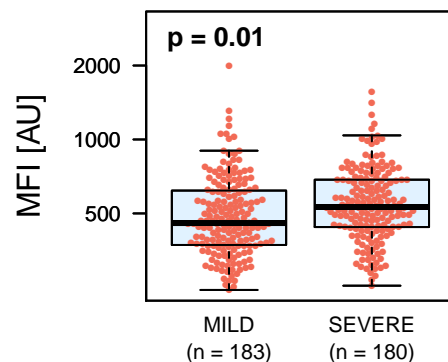

Correlation between experiments

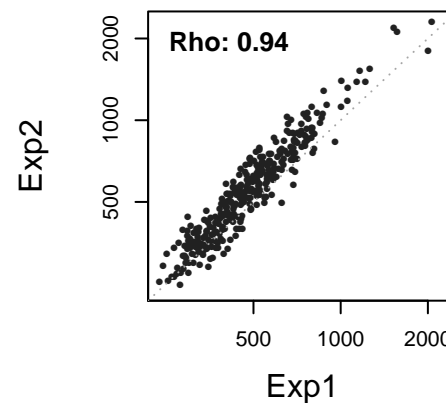

Only samples without dehydration

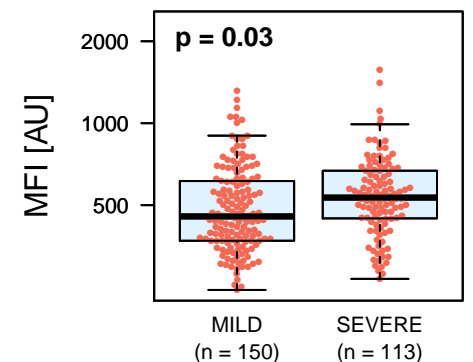

## BPGM

Bisphosphoglycerate mutase  
Antibody: HPA016493

Intensities per sample group

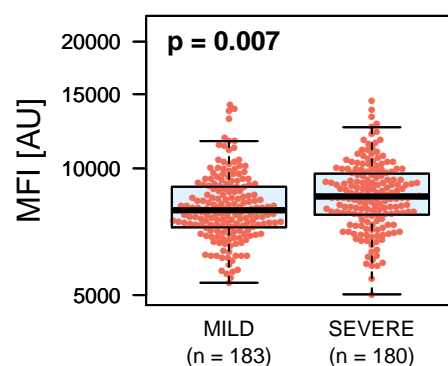

Correlation between experiments

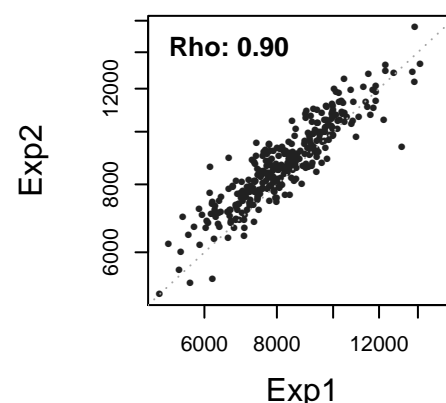

Only samples without dehydration

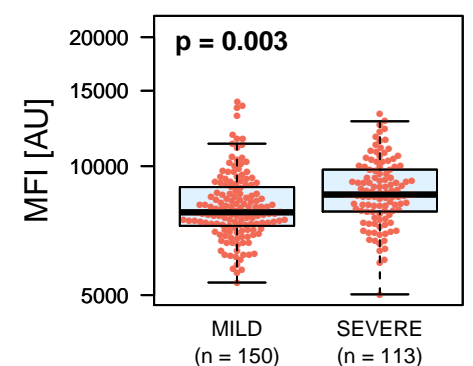

## CA2

Carbonic anhydrase 2  
Antibody: HPA071085

# CALCA

Calcitonin related polypeptide alpha  
Antibody: HPA064453

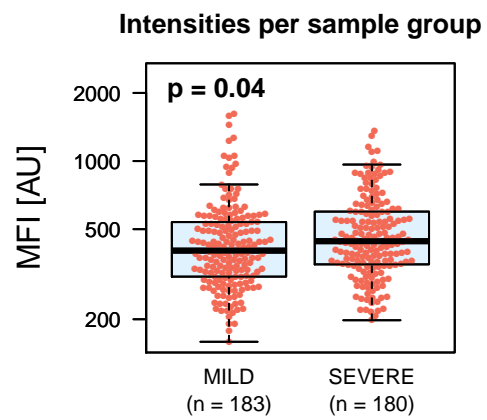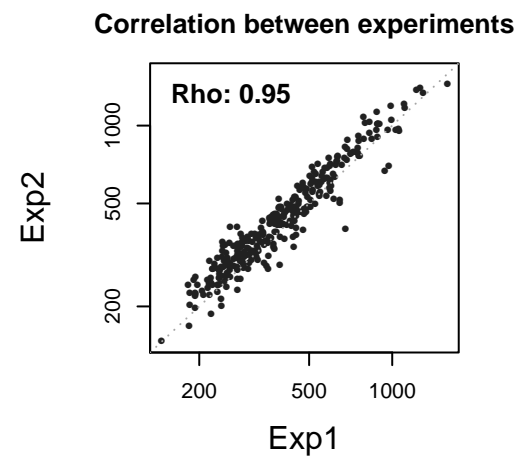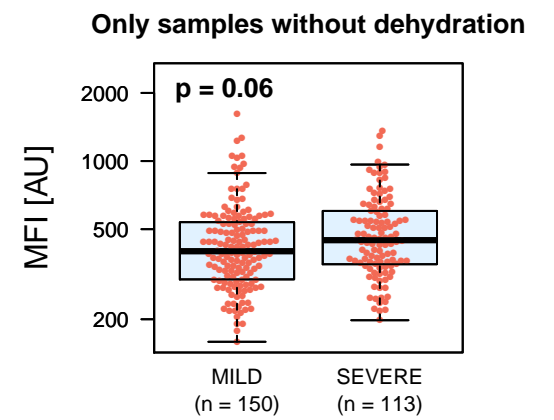

# CD14

CD14 molecule  
Antibody: HPA001887

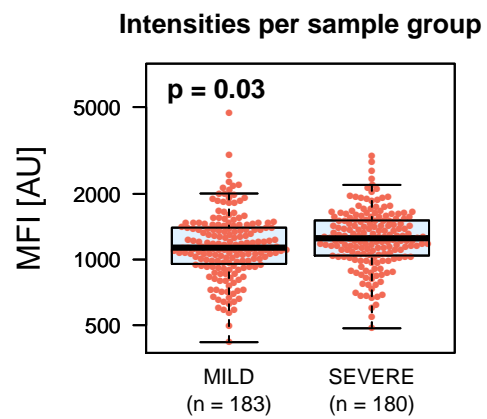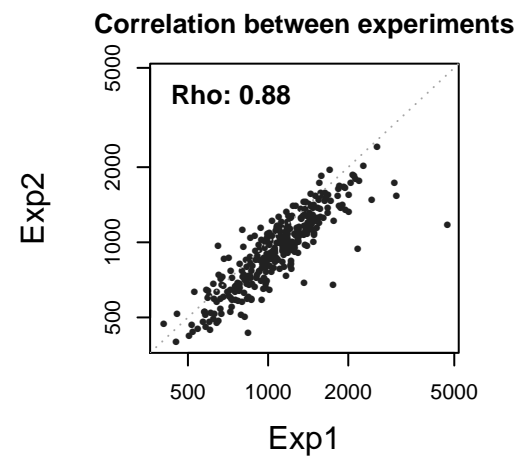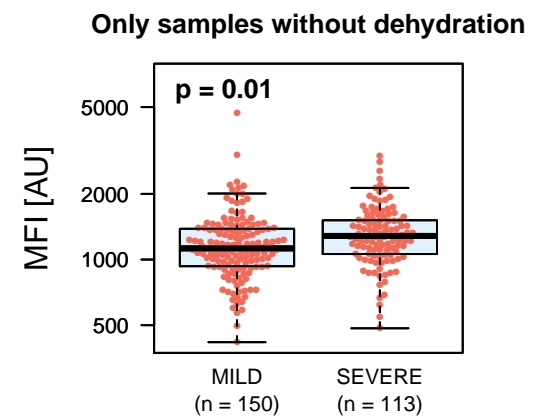

# CD80

CD80 molecule  
Antibody: HPA039851

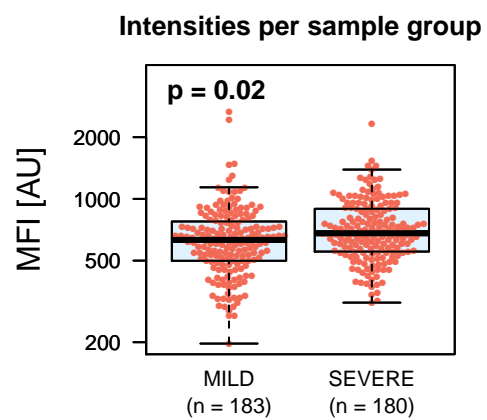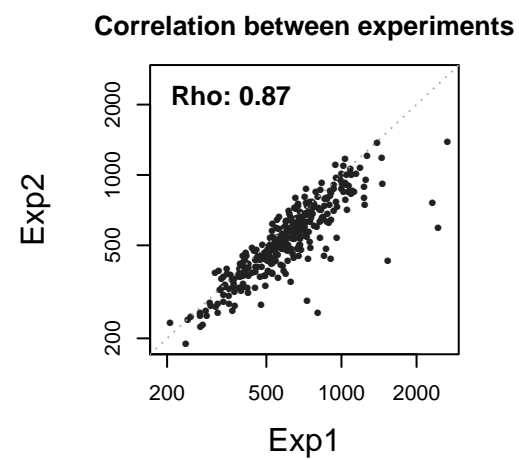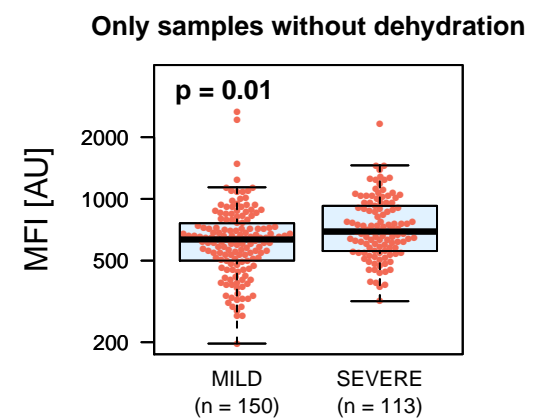

# CDK14

Cyclin dependent kinase 14  
Antibody: HPA015267

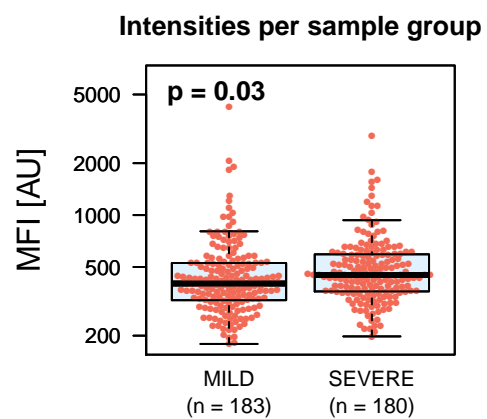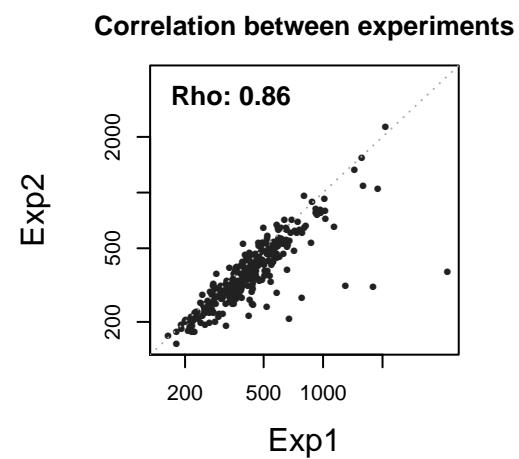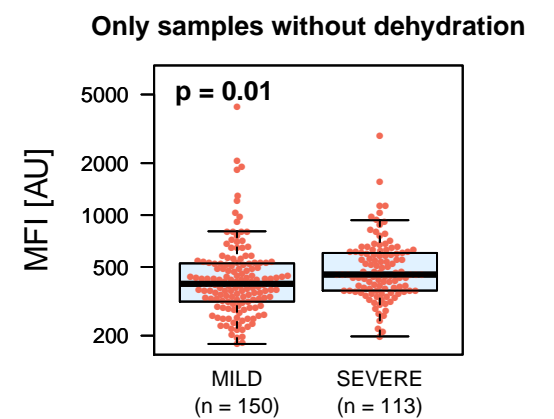

# CEBPA

CCAAT/enhancer binding protein alpha  
Antibody: HPA052734

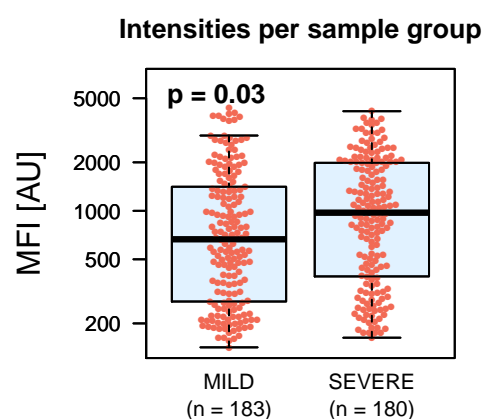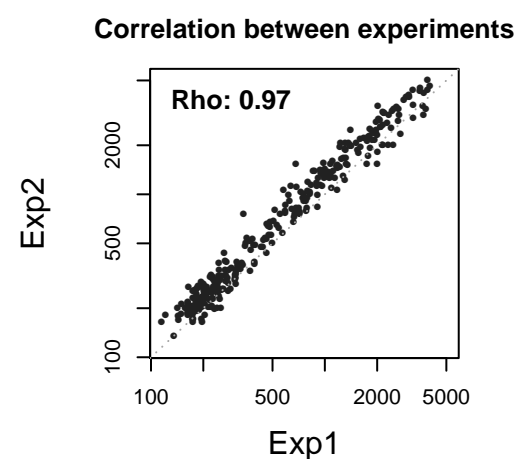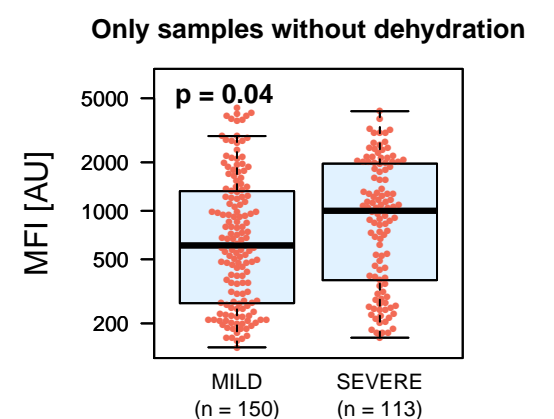

# CKB/CKM

Creatine kinase B/M-type  
Antibody: MAB5564 R&D

Intensities per sample group

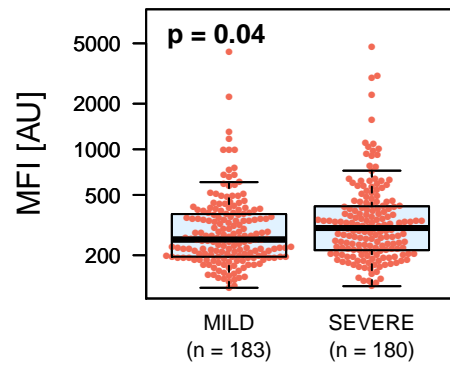

Correlation between experiments

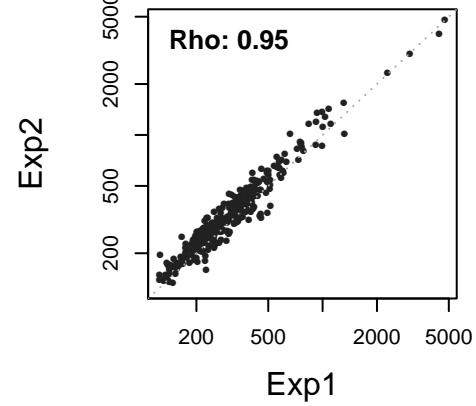

Only samples without dehydration

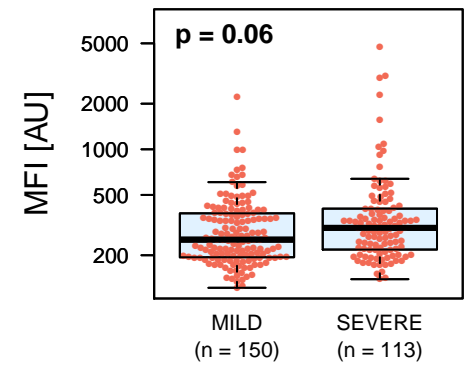

Intensities per sample group

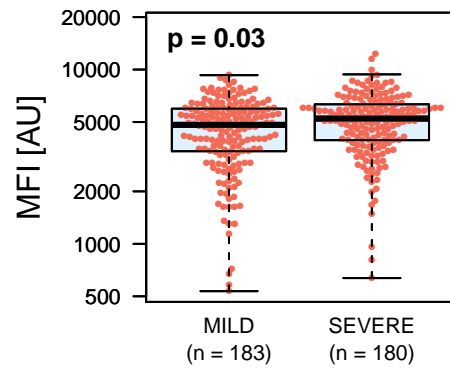

Correlation between experiments

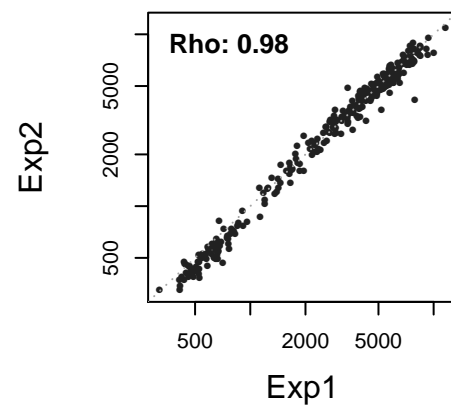

Only samples without dehydration

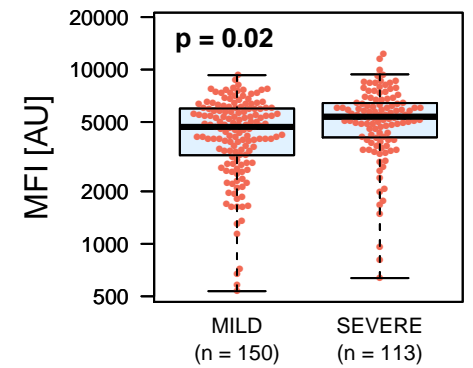

Intensities per sample group

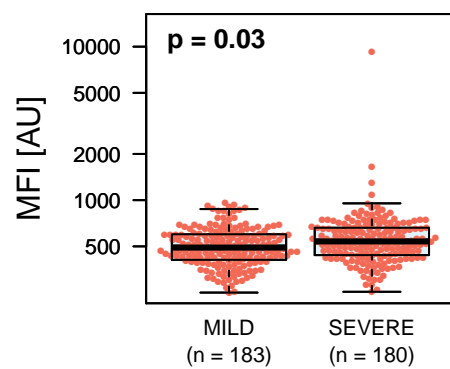

Correlation between experiments

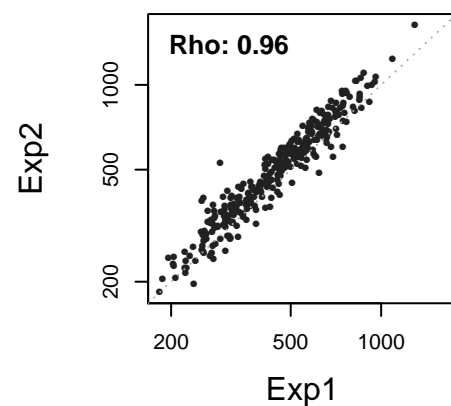

Only samples without dehydration

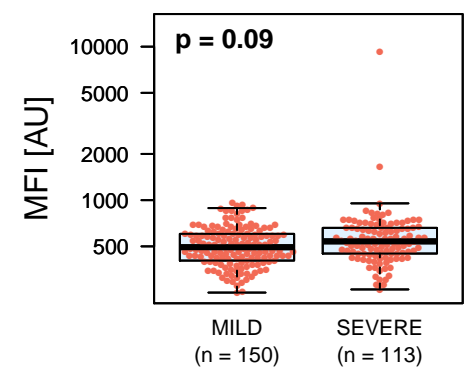

Intensities per sample group

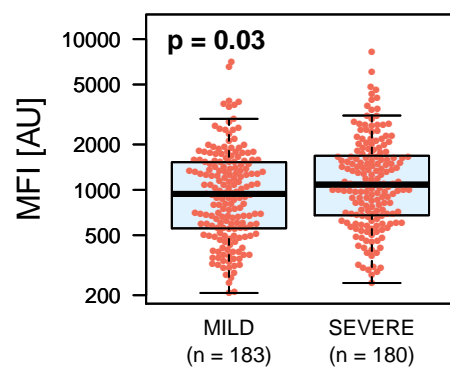

Correlation between experiments

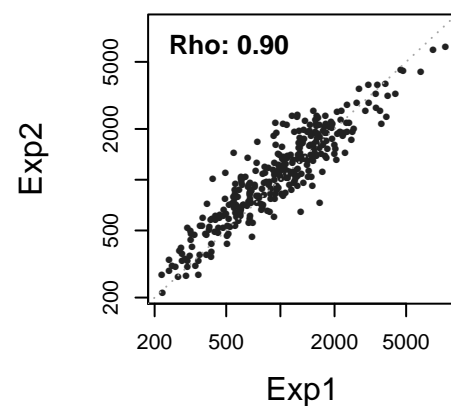

Only samples without dehydration

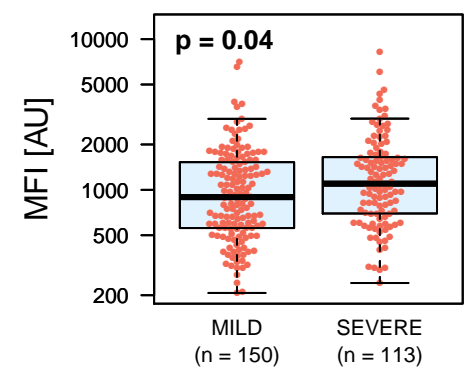

Intensities per sample group

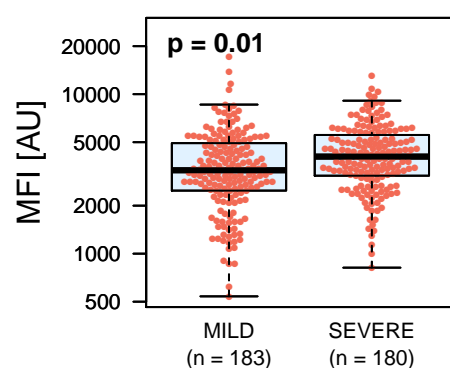

Correlation between experiments

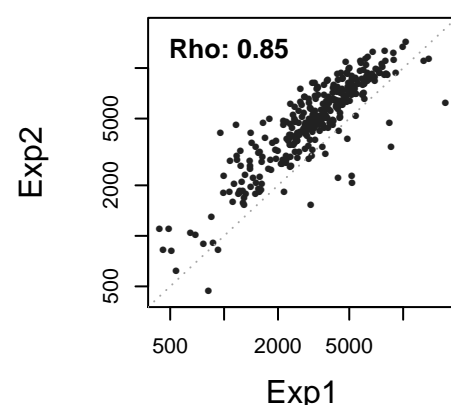

Only samples without dehydration

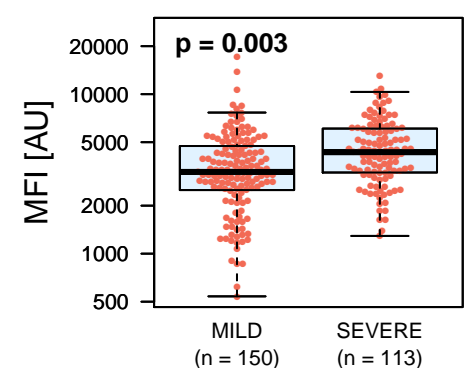

# ELANE

Neutrophil elastase  
Antibody: MAB91671 R&D

# EPB41L2

Erythrocyte membrane protein band 4.1 like 2  
Antibody: HPA005730

Intensities per sample group

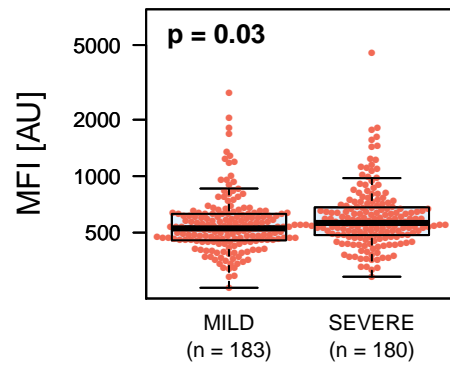

Correlation between experiments

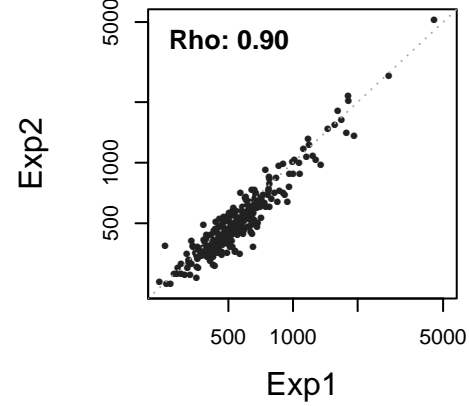

Only samples without dehydration

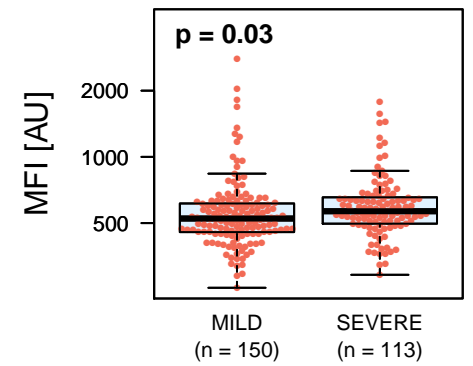

Intensities per sample group

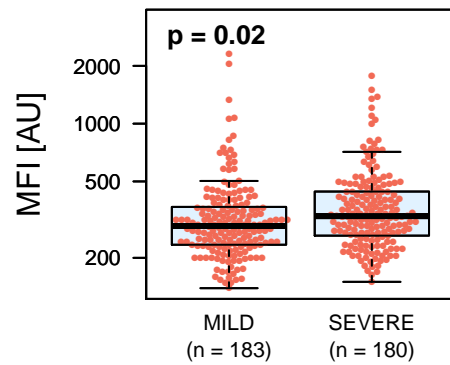

Correlation between experiments

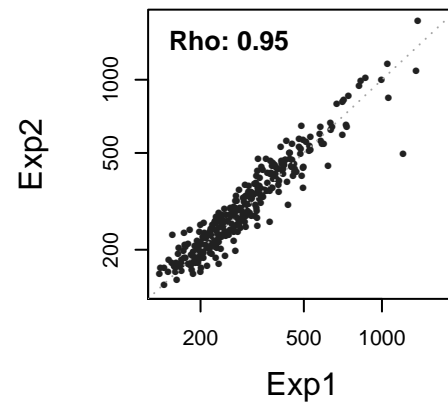

Only samples without dehydration

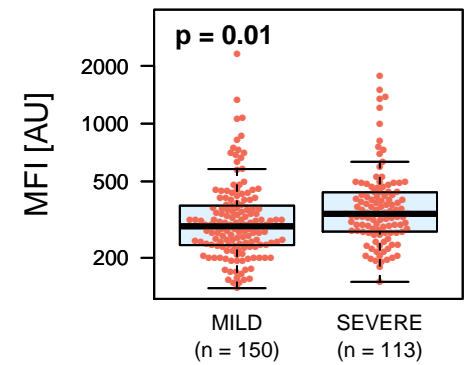

# GYPC

Glycophorin C (Gerbich blood group)  
Antibody: HPA008965

Intensities per sample group

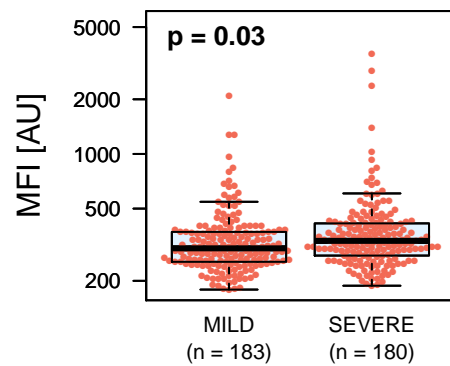

Correlation between experiments

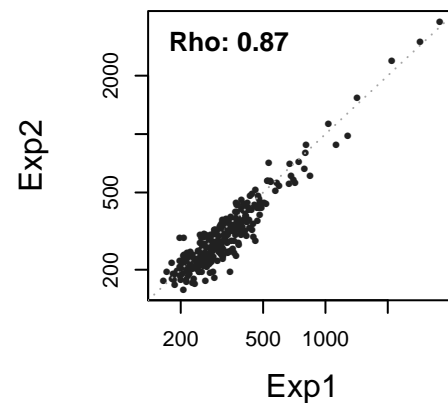

Only samples without dehydration

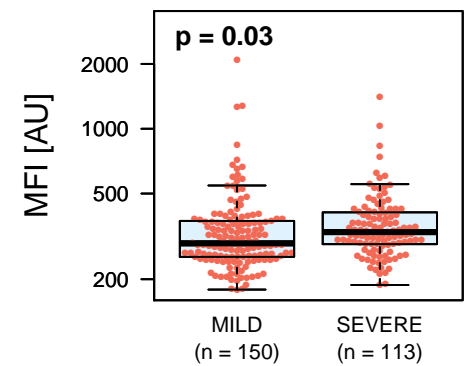

# HAP1

Huntingtin associated protein 1  
Antibody: HPA053019

Intensities per sample group

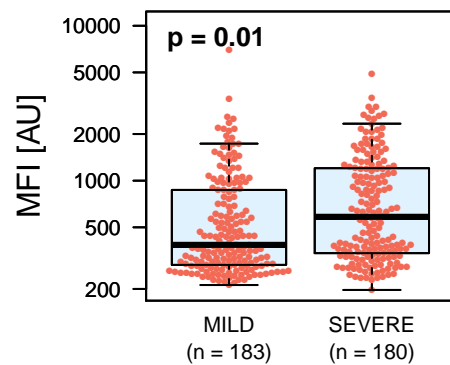

Correlation between experiments

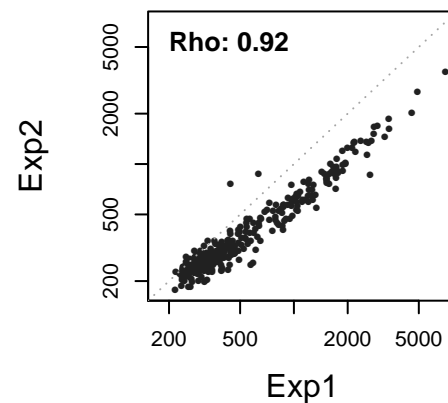

Only samples without dehydration

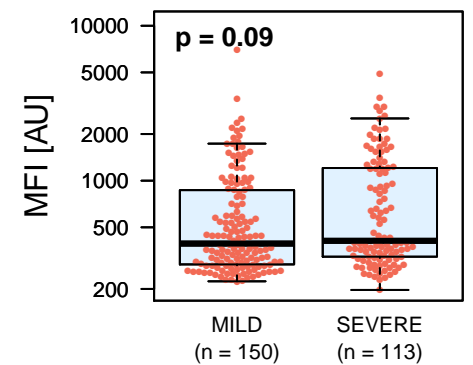

# HBA1/2

Hemoglobin subunit alpha 1/2  
Antibody: HPA043780

Intensities per sample group

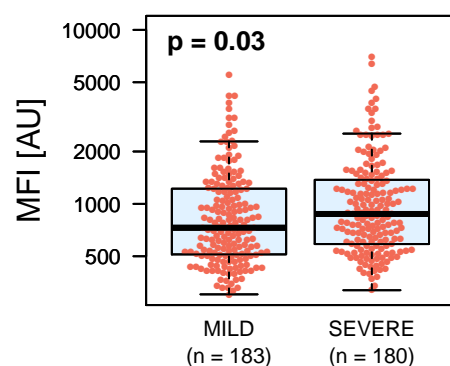

Correlation between experiments

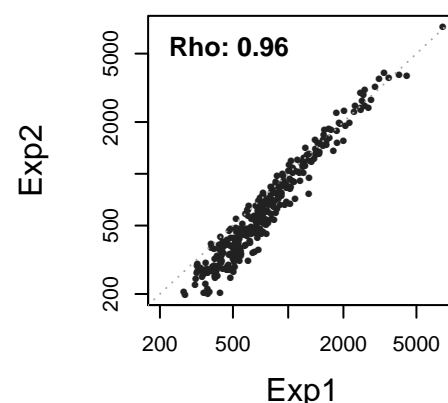

Only samples without dehydration

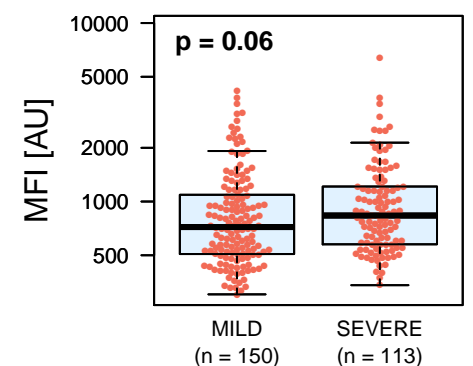

# IGFBP1

Insulin like growth factor binding protein 1  
Antibody: MAB675 R&D

# ITGAV

Integrin subunit alpha V  
Antibody: HPA004856

### Intensities per sample group

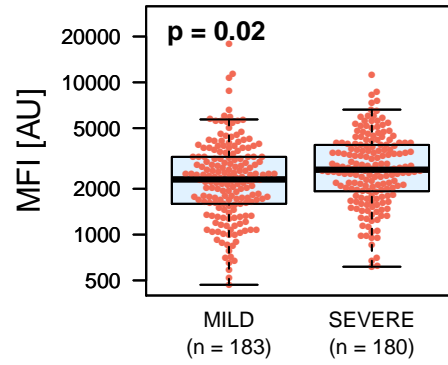

### Correlation between experiments

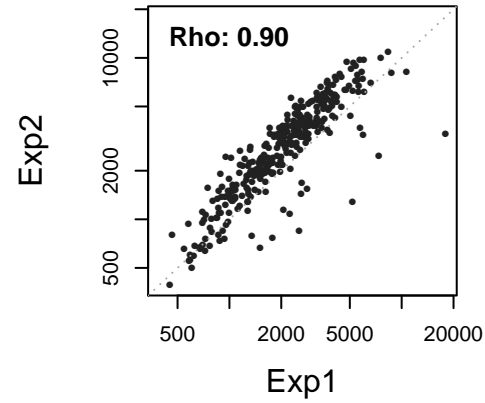

### Only samples without dehydration

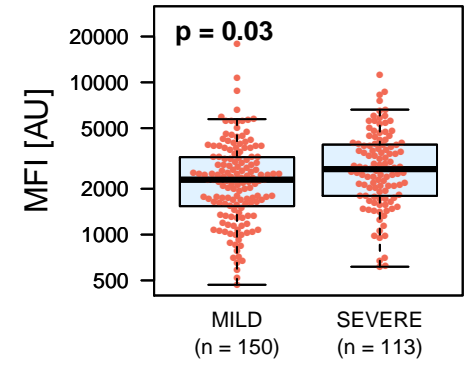

### Intensities per sample group

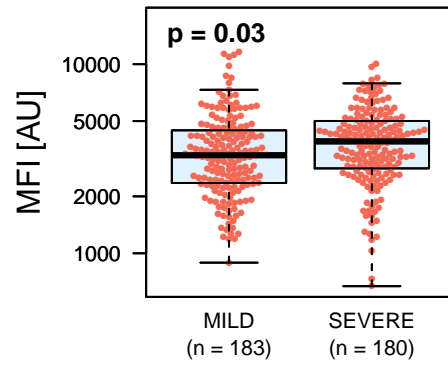

### Correlation between experiments

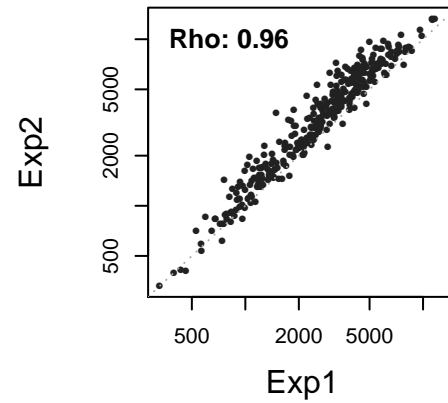

### Only samples without dehydration

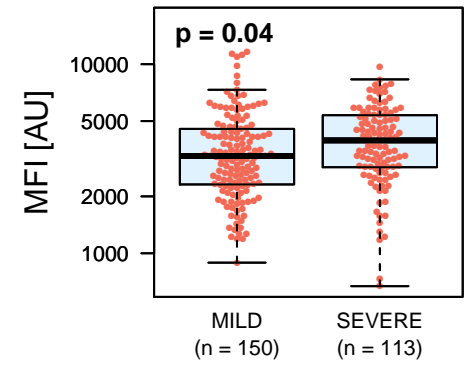

# LBP

Lipopolysaccharide binding protein  
Antibody: HPA001508

### Intensities per sample group

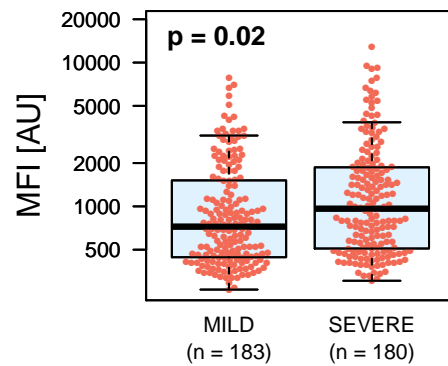

### Correlation between experiments

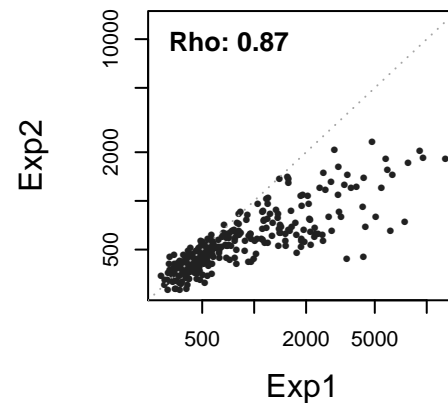

### Only samples without dehydration

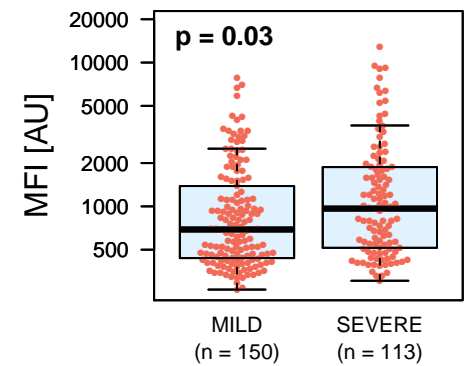

# MMP2

Matrix metalloproteinase 2  
Antibody: HPA001939

### Intensities per sample group

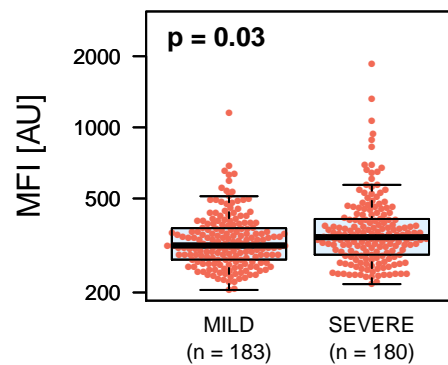

### Correlation between experiments

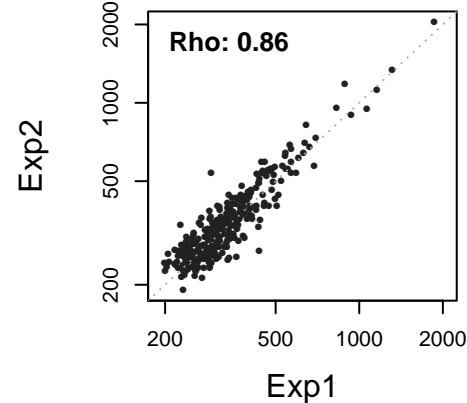

### Only samples without dehydration

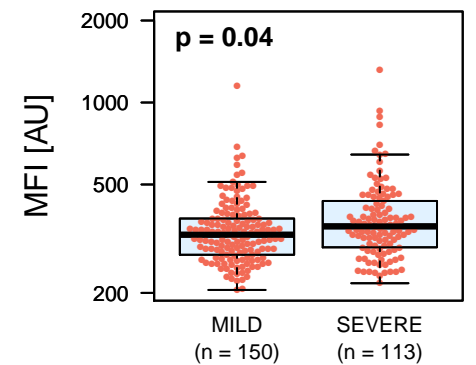

# MMP9

Matrix metalloproteinase 9  
Antibody: HPA001238

### Intensities per sample group

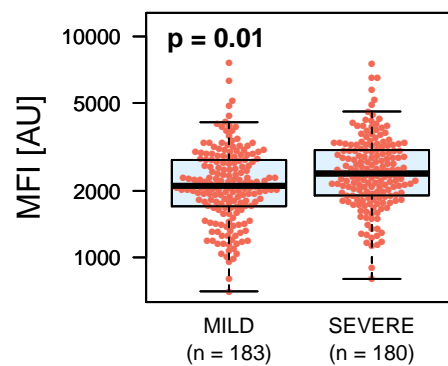

### Correlation between experiments

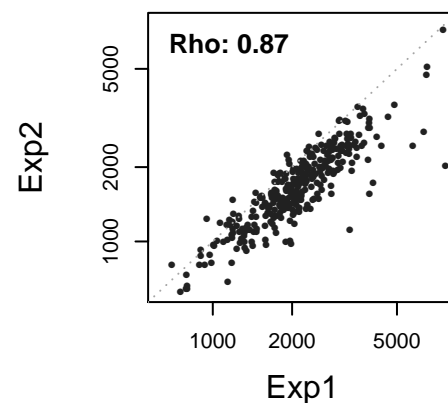

### Only samples without dehydration

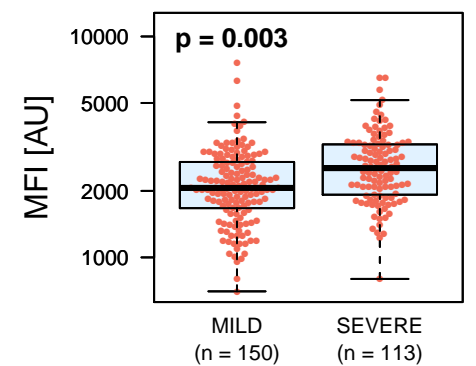

# MPP1

Membrane palmitoylated protein 1  
Antibody: HPA076675

# MYL3

Myosin light chain 3  
Antibody: HPA016564

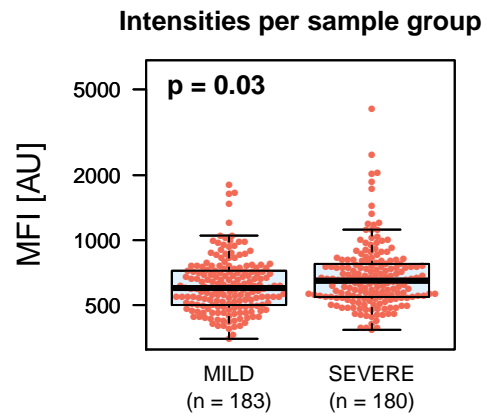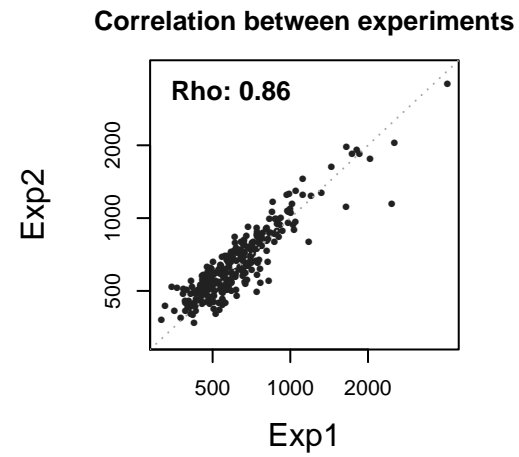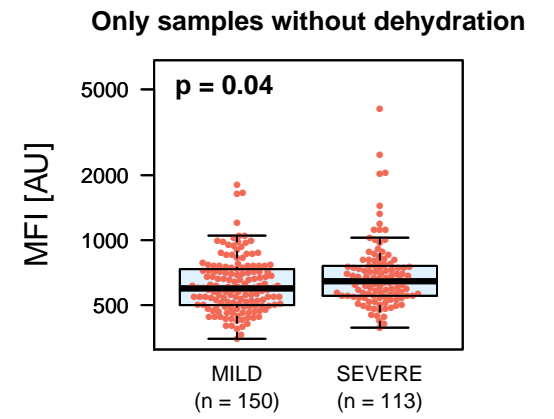

# MYO15A

Myosin XVA  
Antibody: HPA039770

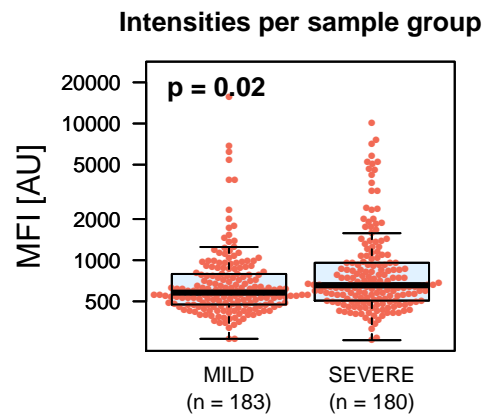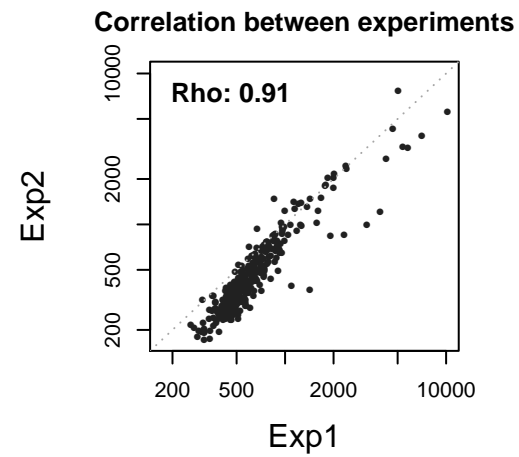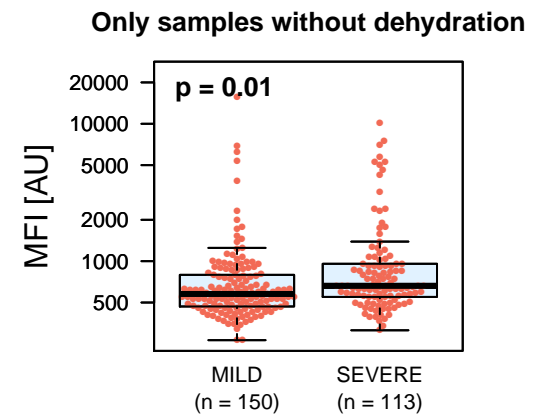

# NEFM

Neurofilament medium  
Antibody: HPA022845

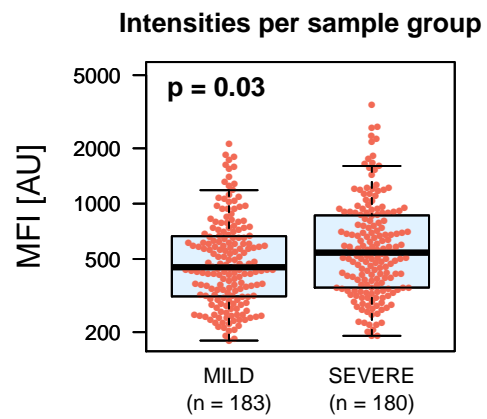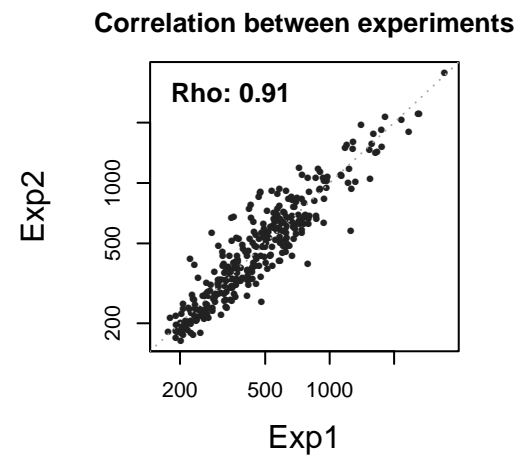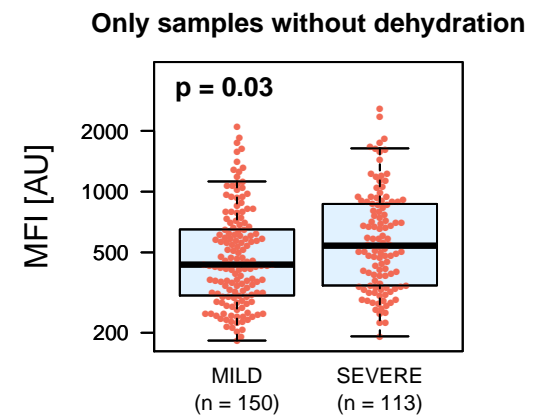

# NGF

Nerve growth factor  
Antibody: HPA063135

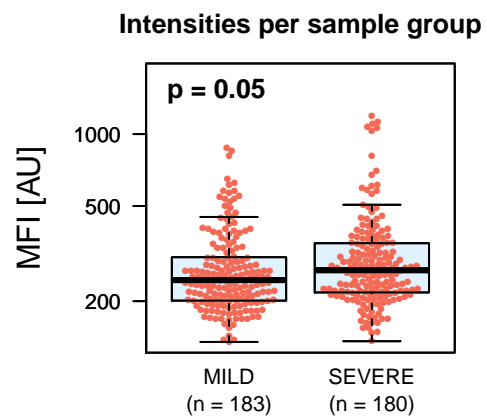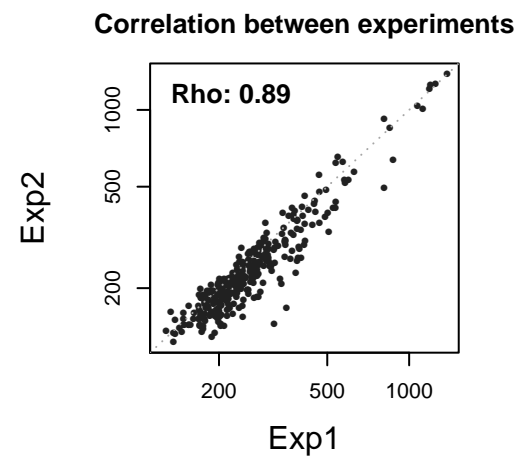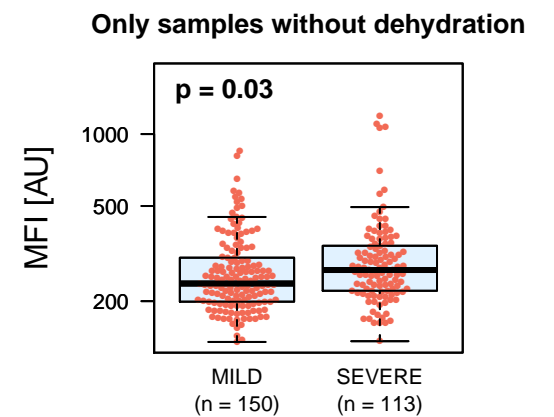

# RIPK2

Receptor interacting serine/threonine kinase 2  
Antibody: HPA015764

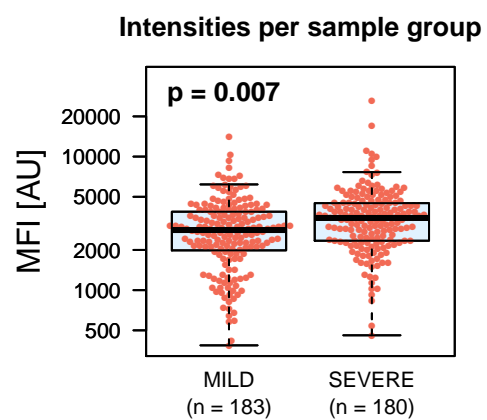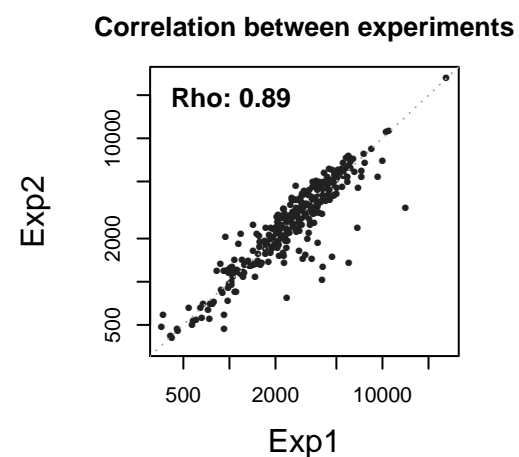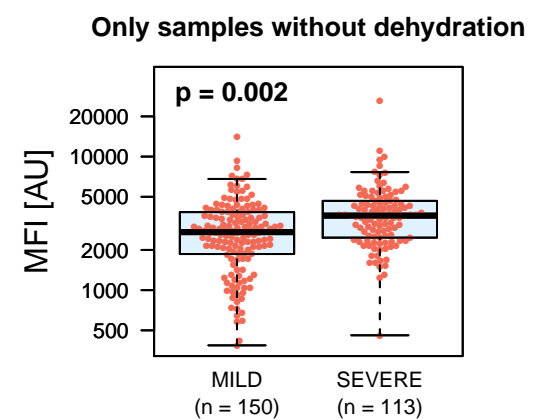

# TIPIN

TIMELESS interacting protein  
Antibody: HPA039704

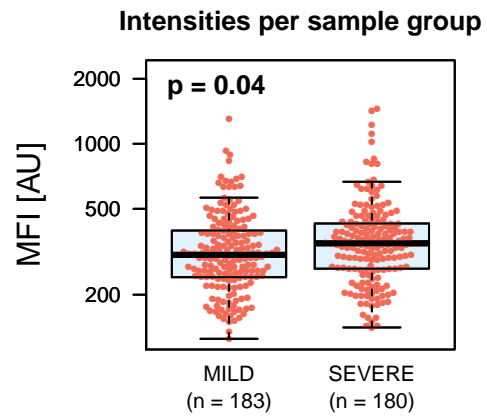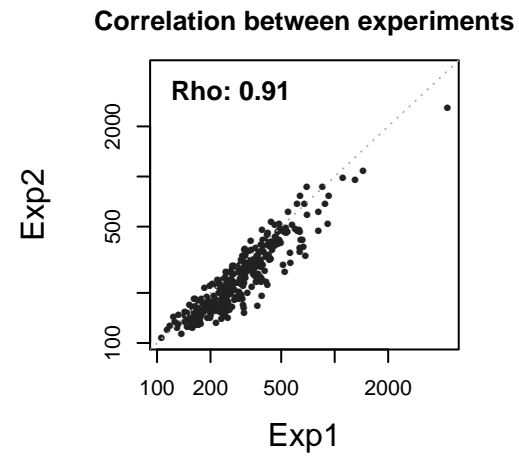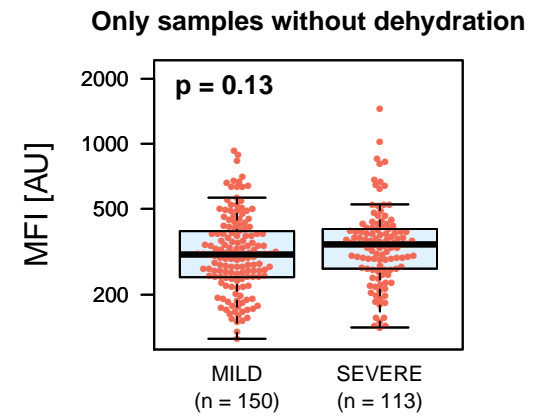

# TNF

Tumor necrosis factor  
Antibody: HPA055037

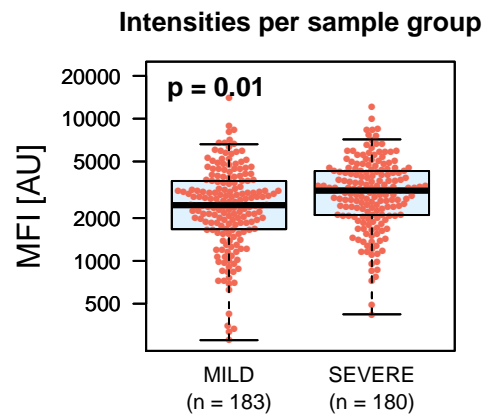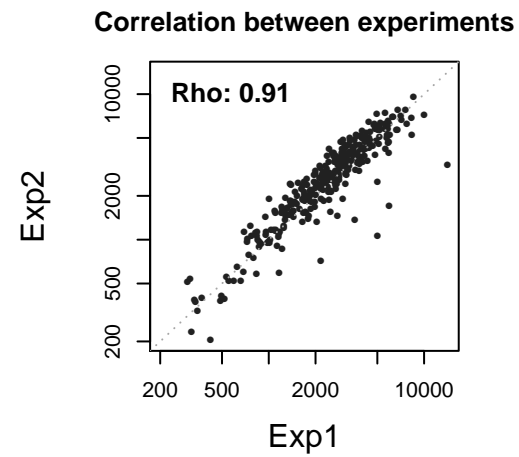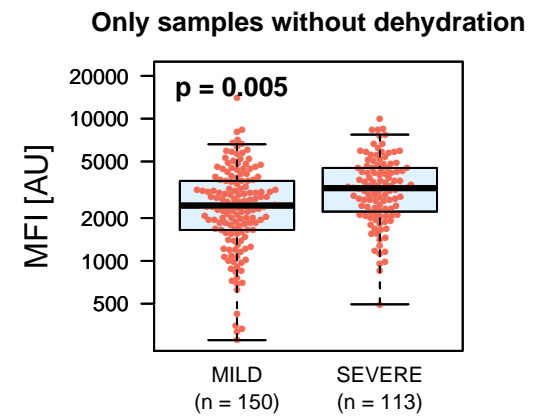

# TNFRSF1B

TNF receptor superfamily member 1B  
Antibody: HPA004796

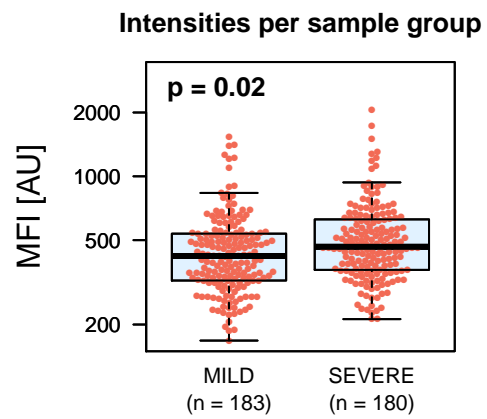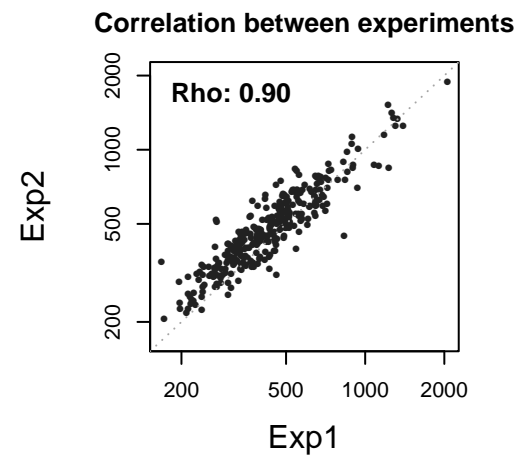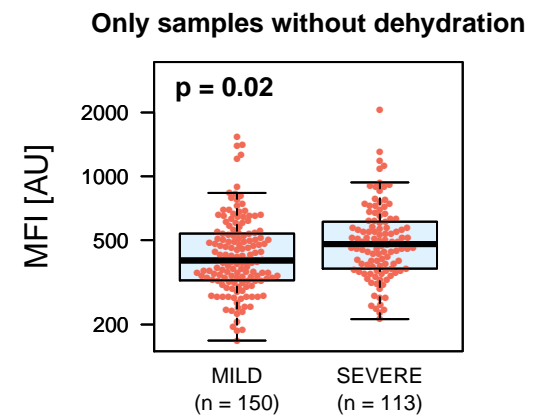

# TNFSF13B

TNF superfamily member 13b  
Antibody: HPA030526

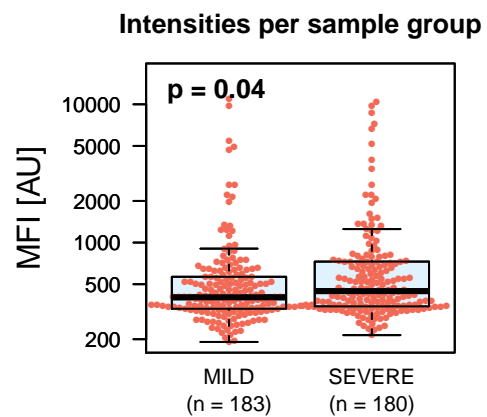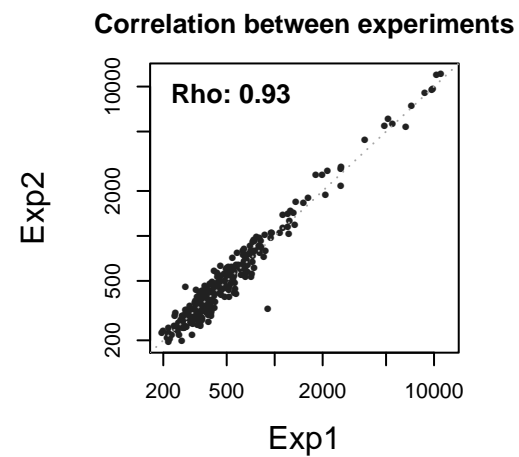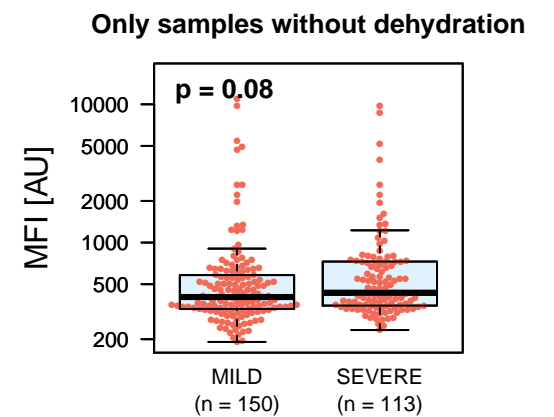

# VCAM1

Vascular cell adhesion molecule 1  
Antibody: HPA001618

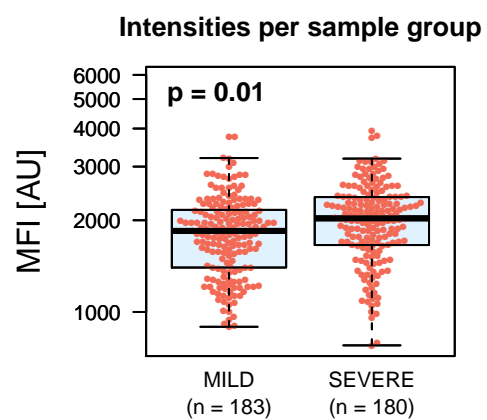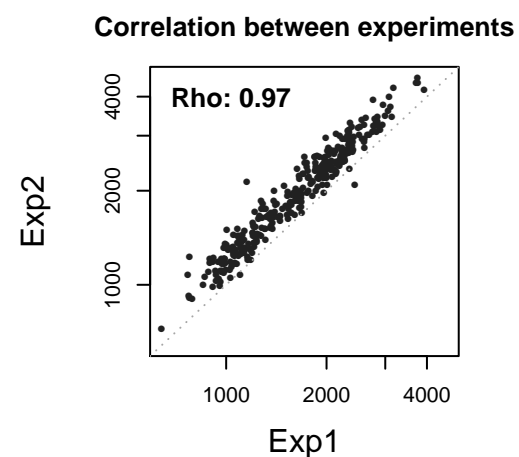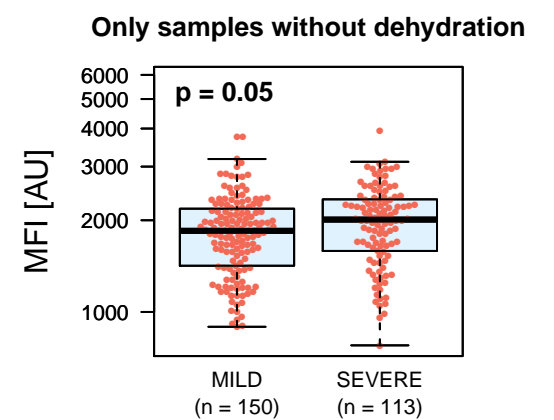

# VWF

von Willebrand factor  
Antibody: HPA002082

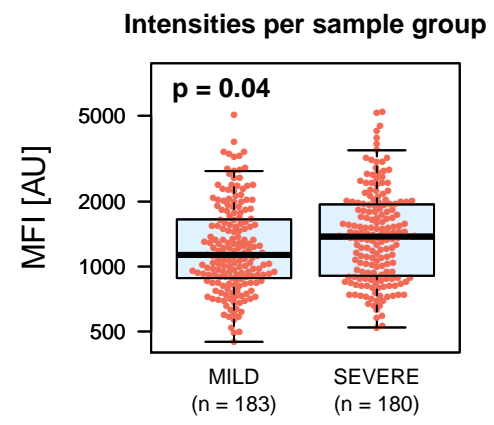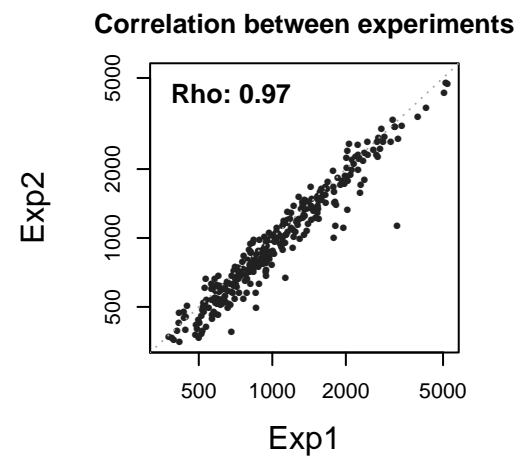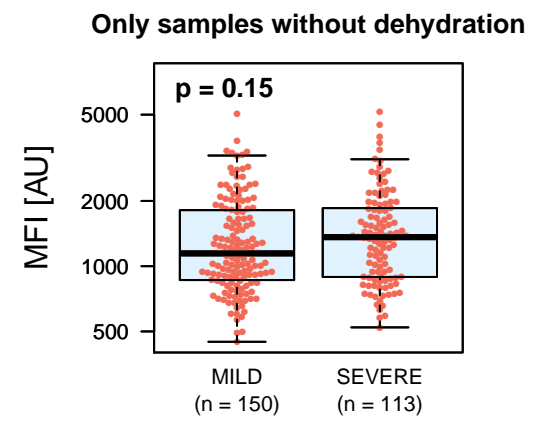

Supplement: MOESM9 [file 16273274]
