# Supplementary material for: Levels of human proteins in plasma associated with acute paediatric malaria
Source: PubMed Central journal article supplement (PMC6238294; doi:10.1186/s12936-018-2576-y), 2018-11-15
Supplement: 12936_2018_2576_MOESM5_ESM.pdf [file 12936_2018_2576_MOESM5_ESM.pdf]

## Additional file 5. Proteins with significantly altered levels between mild malaria and severe malaria cases

| Gene      | UniprotID      | Gene description                                           | p-value                 | Antibody                            |
|-----------|----------------|------------------------------------------------------------|-------------------------|-------------------------------------|
| ADAMTS13  | Q76LX8         | ADAM metalloproteinase with thrombospondin type 1 motif 13 | 0.024                   | HPA042014                           |
| AGT       | P01019         | Angiotensinogen                                            | 0.029                   | MAB3156 R&D                         |
| ANK1      | P16157         | Ankyrin 1                                                  | 0.046                   | HPA004842                           |
| BPGM      | P07738         | Bisphosphoglycerate mutase                                 | 0.012                   | HPA016493                           |
| CA2       | P00918         | Carbonic anhydrase 2                                       | 0.007                   | HPA071085                           |
| CALCA     | P01258, P06881 | Calcitonin related polypeptide alpha                       | 0.043                   | HPA064453                           |
| CD14      | P08571         | CD14 molecule                                              | 0.029<br>0.044          | HPA001887<br>HPA002127              |
| CD80      | P33681         | CD80 molecule                                              | 0.021                   | HPA039851                           |
| CDK14     | O94921         | Cyclin dependent kinase 14                                 | 0.026                   | HPA015267                           |
| CEBPA     | P49715         | CCAAT/enhancer binding protein alpha                       | 0.029                   | HPA052734                           |
| CKB/CKM   | P12277, P06732 | Creatine kinase B/M-type                                   | 0.036                   | MAB5564 R&D                         |
| CRP       | P02741         | C-reactive protein                                         | 0.034                   | HPA027396                           |
| CSF1      | P09603         | Colony stimulating factor 1                                | 0.029<br>0.036          | HPA061864<br>HPA044339              |
| DAPK1     | P53355         | Death associated protein kinase 1                          | 0.033                   | HPA040472                           |
| ELANE     | P08246         | Neutrophil elastase                                        | 0.012                   | MAB91671 R&D                        |
| EPB41L2   | O43491         | Erythrocyte membrane protein band 4.1 like 2               | 0.029                   | HPA005730                           |
| GYPC      | P04921         | Glycophorin C (Gerbich blood group)                        | 0.016                   | HPA008965                           |
| HAP1      | P54257         | Huntingtin associated protein 1                            | 0.026                   | HPA053019                           |
| HBA1/HBA2 | P69905         | Hemoglobin subunit alpha 1/2                               | 0.012                   | HPA043780                           |
| IGFBP1    | P08833         | Insulin like growth factor binding protein 1               | 0.030                   | MAB675 R&D                          |
| ITGAV     | P06756         | Integrin subunit alpha V                                   | 0.024                   | HPA004856                           |
| LBP       | P18428         | Lipopolysaccharide binding protein                         | 0.030                   | HPA001508                           |
| MMP2      | P08253         | Matrix metalloproteinase 2                                 | 0.023                   | HPA001939                           |
| MMP9      | P14780         | Matrix metalloproteinase 9                                 | 0.029                   | HPA001238                           |
| MPP1      | Q00013         | Membrane palmitoylated protein 1                           | 0.012                   | HPA076675                           |
| MYL3      | P08590         | Myosin light chain 3                                       | 0.033                   | HPA016564                           |
| MYO15A    | Q9UKN7         | Myosin XVA                                                 | 0.024                   | HPA039770                           |
| NEFM      | P07197         | Neurofilament medium                                       | 0.029                   | HPA022845                           |
| NGF       | P01138         | Nerve growth factor                                        | 0.047                   | HPA063135                           |
| RIPK2     | O43353         | Receptor interacting serine/threonine kinase 2             | 0.007<br>0.015          | HPA015764<br>HPA016499              |
| TIPIN     | Q9BVW5         | TIMELESS interacting protein                               | 0.038                   | HPA039704                           |
| TNF       | P01375         | Tumor necrosis factor                                      | 0.015<br>0.032<br>0.048 | HPA055037<br>HPA050631<br>HPA077901 |
| TNFRSF1B  | P20333         | Tumor necrosis factor receptor superfamily member 1B       | 0.020                   | HPA004796                           |
| TNFSF13B  | Q9Y275         | Tumor necrosis factor superfamily member 13b               | 0.036                   | HPA030526                           |
| VCAM1     | P19320         | Vascular cell adhesion molecule 1                          | 0.012<br>0.017<br>0.026 | HPA001618<br>HPA069867<br>HPA034795 |
| VWF       | P04275         | von Willebrand factor                                      | 0.036                   | HPA002082                           |
