# Supplementary material for: Levels of human proteins in plasma associated with acute paediatric malaria
Source: Springer Nature journal article supplement (doi:10.1186/s12936-018-2576-y), 2018-11-15
Supplement: MOESM1 [file 16273274]

## Additional file 1. Clinical patient characteristics

| Variable                  | Parameter                         | Community controls | Mild malaria    | Severe malaria  |
|---------------------------|-----------------------------------|--------------------|-----------------|-----------------|
|                           | <b>Total nr of samples</b>        | <b>178</b>         | <b>183</b>      | <b>180</b>      |
| <b>Sex [n, %]</b>         | <b>Female</b>                     | 97 (54.5%)         | 90 (49.2%)      | 95 (54.5%)      |
|                           | <b>Male</b>                       | 81 (45.5%)         | 93 (50.8%)      | 85 (45.5%)      |
| <b>Age [month]</b>        | <b>Mean (<math>\pm</math> SD)</b> | 41.3 $\pm$ 17.5    | 44.6 $\pm$ 18.1 | 46.0 $\pm$ 16.6 |
| <b>Nutrition [n, %]</b>   | <b>Moderate undernutrition</b>    | 11 (6.2%)          | 18 (9.8%)       | 22 (12.2%)      |
|                           | <b>Normal nutrition</b>           | 128 (71.9%)        | 109 (59.6%)     | 110 (61.1%)     |
|                           | <b>Severe undernutrition</b>      | 10 (5.6%)          | 5 (2.7%)        | 6 (3.3%)        |
|                           | <b>Info is missing</b>            | 29 (16.3%)         | 51 (27.9%)      | 42 (23.3%)      |
| <b>Temperature [°C]</b>   | <b>Mean (<math>\pm</math> SD)</b> | 36.6 $\pm$ 0.5     | 37.8 $\pm$ 1.1  | 38.3 $\pm$ 1.3  |
|                           | <b>Info is missing [n, %]</b>     | 9 (5%)             | 11 (6%)         | 17 (9.4%)       |
| <b>Dehydration [n, %]</b> | <b>No</b>                         | 73 (41%)           | 150 (82%)       | 113 (62.8%)     |
|                           | <b>Yes</b>                        | 0 (0%)             | 18 (9.8%)       | 54 (30%)        |
|                           | <b>Info is missing</b>            | 105 (59%)          | 15 (8.2%)       | 13 (7.2%)       |
