# Supplementary material for: Levels of human proteins in plasma associated with acute paediatric malaria
Source: Springer Nature journal article supplement (doi:10.1186/s12936-018-2576-y), 2018-11-15
Supplement: MOESM2 [file 16273274]

**Additional file 2. Information about the number of individuals with the different forms of severe malaria**

| Hyper-parasitemia | Respiratory distress | Hyper-pyrexia | Prostration | Cerebral malaria | Severe anemia | Febrile convulsion | Only one symptom |                      |
|-------------------|----------------------|---------------|-------------|------------------|---------------|--------------------|------------------|----------------------|
| 70                | 14                   | 8             | 2           | 2                | 7             | 1                  | 47               | Hyper-parasitemia    |
|                   | 53                   | 23            | 1           | 5                | 7             | 1                  | 14               | Respiratory distress |
|                   |                      | 37            | 0           | 1                | 2             | 0                  | 10               | Hyper-pyrexia        |
|                   |                      |               | 27          | 0                | 1             | 0                  | 23               | Prostration          |
|                   |                      |               |             | 20               | 1             | 0                  | 14               | Cerebral malaria     |
|                   |                      |               |             |                  | 16            | 0                  | 5                | Severe anemia        |
|                   |                      |               |             |                  |               | 16                 | 15               | Febrile convulsion   |
|                   |                      |               |             |                  |               |                    | 3                | Only one symptom     |
