# Supplementary material for: Levels of human proteins in plasma associated with acute paediatric malaria
Source: Springer Nature journal article supplement (doi:10.1186/s12936-018-2576-y), 2018-11-15
Supplement: MOESM4 [file 16273274]

## Additional file 4. Proteins significantly discriminating between community controls and malaria cases

| Gene name    | UniprotID            | Gene description                                                  | p-value                 | Antibody                             |
|--------------|----------------------|-------------------------------------------------------------------|-------------------------|--------------------------------------|
| ACTN2        | P35609               | Actinin alpha 2                                                   | 2E-09                   | HPA008315                            |
| ADAMTS13     | Q76LX8               | ADAM metalloproteinase w. thrombospondin type 1 motif 13          | 1E-07                   | HPA042014                            |
| ADM          | P35318               | Adrenomedullin                                                    | 3E-10                   | HPA070396                            |
| ADSSL1       | Q8N142               | Adenylosuccinate synthase like 1                                  | 4E-55                   | HPA052621                            |
| AGT          | P01019               | Angiotensinogen                                                   | 1E-13                   | MAB3156 R&D                          |
| ANK1         | P16157               | Ankyrin 1                                                         | 2E-04                   | HPA004842                            |
| ANK3         | Q12955               | Ankyrin 3                                                         | 2E-06                   | HPA055643                            |
| BPGM         | P07738               | Bisphosphoglycerate mutase                                        | 2E-10                   | HPA016493                            |
| CALCA        | P01258;P06881        | Calcitonin related polypeptide alpha                              | 8E-28                   | HPA064453                            |
| CALCA/B      | P10092;P01258;P06881 | Calcitonin related polypeptide alpha/beta                         | 3E-10<br>5E-04          | HPA043700<br>HPA059886               |
| CCL17        | Q92583               | C-C motif chemokine ligand 17                                     | 4E-11                   | HPA068163                            |
| CCL5         | P13501               | C-C motif chemokine ligand 5                                      | 1E-38<br>1E-04          | HPA010552<br>HPA042290               |
| CD14         | P08571               | CD14 molecule                                                     | 6E-31<br>1E-29          | HPA001887<br>HPA002127               |
| CD80         | P33681               | CD80 molecule                                                     | 7E-24                   | HPA039851                            |
| CD86         | P42081               | CD86 molecule                                                     | 3E-06                   | HPA072318                            |
| CDK14        | Q94921               | Cyclin dependent kinase 14                                        | 3E-11                   | HPA015267                            |
| CEBPA        | P49715               | CCAAT/enhancer binding protein alpha                              | 5E-83                   | HPA052734                            |
| CRP          | P02741               | C-reactive protein                                                | 7E-109<br>4E-45         | HPA027396<br>DY1707 R&D              |
| CSF1         | P09603               | Colony stimulating factor 1                                       | 5E-60<br>5E-51<br>2E-34 | HPA061864<br>HPA022244<br>HPA044339  |
| CTSD         | P07339               | Cathepsin D                                                       | 5E-15                   | HPA003001                            |
| ELANE        | P08246               | Neutrophil elastase                                               | 5E-13<br>1E-04          | MAB91671 R&D<br>HPA001184            |
| EPB41L2      | O43491               | Erythrocyte membrane protein band 4.1 like 2                      | 2E-15<br>2E-10          | HPA006642<br>HPA005730               |
| ETFB         | P38117               | Electron transfer flavoprotein beta subunit                       | 3E-07                   | HPA018910                            |
| GYPC         | P04921               | Glycophorin C (Gerbich blood group)                               | 2E-28                   | HPA008965                            |
| HABP2        | Q14520               | Hyaluronan binding protein 2                                      | 4E-05                   | HPA019518                            |
| HAP1         | P54257               | Huntingtin associated protein 1                                   | 9E-06<br>2E-04          | HPA053019<br>HPA023368               |
| HBA1/2       | P69905               | Hemoglobin subunit alpha 1/2                                      | 1E-05                   | HPA043780                            |
| HSPG2        | P98160               | Heparan sulfate proteoglycan 2                                    | 1E-04                   | HPA072690                            |
| ICAM1        | P05362               | Intercellular adhesion molecule 1                                 | 2E-08                   | DY720 R&D                            |
| IGFBP1       | P08833               | Insulin like growth factor binding protein 1                      | 1E-21<br>4E-21<br>4E-15 | MAB675 R&D<br>DY871 R&D<br>HPA046972 |
| IL6          | P05231               | Interleukin 6                                                     | 9E-13                   | HPA064428                            |
| ITGAV        | P06756               | Integrin subunit alpha V                                          | 3E-33                   | HPA004856                            |
| JCHAIN       | P01591               | Joining chain of multimeric IgA and IgM                           | 3E-04                   | HPA044132                            |
| LBP          | P18428               | Lipopolysaccharide binding protein                                | 4E-87                   | HPA001508                            |
| LCP1         | P13796               | Lymphocyte cytosolic protein 1                                    | 6E-39                   | HPA019493                            |
| LCP1, PLS1/3 | P13796;Q14651;P13797 | Lymphocyte cytosolic protein 1, Plastin 3/ Plastin 1,             | 3E-33                   | HPA000895                            |
| MMP2         | P08253               | Matrix metalloproteinase 2                                        | 2E-42                   | HPA001939                            |
| MMP9         | P14780               | Matrix metalloproteinase 9                                        | 1E-11<br>5E-07          | HPA001238<br>HPA063909               |
| MPP1         | Q00013               | Membrane palmitoylated protein 1                                  | 9E-11                   | HPA076675                            |
| MYL3         | P08590               | Myosin light chain 3                                              | 3E-18                   | HPA016564                            |
| MYO15A       | Q9UKN7               | Myosin XVA                                                        | 2E-10                   | HPA039770                            |
| NEFM         | P07197               | Neurofilament medium                                              | 8E-16                   | HPA022845                            |
| NGF          | P01138               | Nerve growth factor                                               | 4E-06<br>7E-04          | HPA063135<br>MAB256 R&D              |
| ORM1/2       | P02763;P19652        | Orosomucoid 1/2                                                   | 5E-27                   | HPA047725                            |
| PAFAH1B3     | Q15102               | Platelet activating factor acetylhydrolase 1b catalytic subunit 3 | 2E-04                   | HPA072475                            |
| RIPK2        | O43353               | Receptor interacting serine/threonine kinase 2                    | 1E-14<br>3E-11          | HPA016499<br>HPA015764               |
| SEC24C       | P53992               | SEC24 homolog C, COPII coat complex component                     | 1E-07                   | HPA040213                            |
| SERPINA3     | P01011               | Serpin family A member 3                                          | 2E-50<br>4E-50          | HPA002560<br>HPA000893               |
| SLC12A3      | P55017               | Solute carrier family 12 member 3                                 | 4E-09                   | HPA028748                            |
| SLC25A20     | O43772               | Solute carrier family 25 member 20                                | 2E-04                   | HPA016862                            |
| SPARC        | P09486               | Secreted protein acidic and cysteine rich                         | 5E-26                   | HPA003020                            |
| TIPIN        | Q9BVV5               | TIMELESS interacting protein                                      | 4E-19                   | HPA039704                            |
| TNF          | P01375               | Tumor necrosis factor                                             | 3E-43<br>1E-13          | HPA077901<br>HPA055037               |
| TNFRSF1B     | P20333               | TNF receptor superfamily member 1B                                | 7E-04                   | HPA004796                            |
| TNFSF13B     | Q9Y275               | TNF superfamily member 13b                                        | 6E-12                   | HPA030526                            |
| VCAM1        | P19320               | Vascular cell adhesion molecule 1                                 | 2E-74<br>3E-39<br>5E-29 | HPA001618<br>HPA069867<br>HPA034795  |
| VWF          | P04275               | von Willebrand factor                                             | 1E-75<br>6E-38          | HPA002082<br>HPA001815               |
