# Supplementary material for: Levels of human proteins in plasma associated with acute paediatric malaria
Source: Springer Nature journal article supplement (doi:10.1186/s12936-018-2576-y), 2018-11-15
Supplement: MOESM6 [file 16273274]

# Additional file 6. t-SNE plots

## Sample subgroup

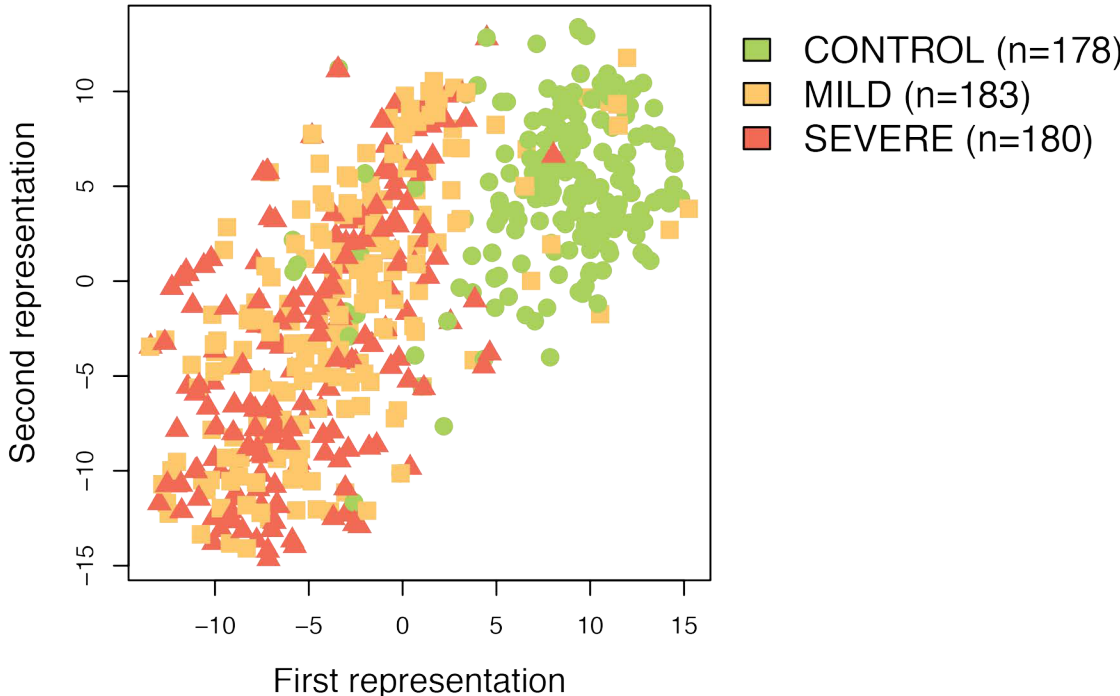

## Sex

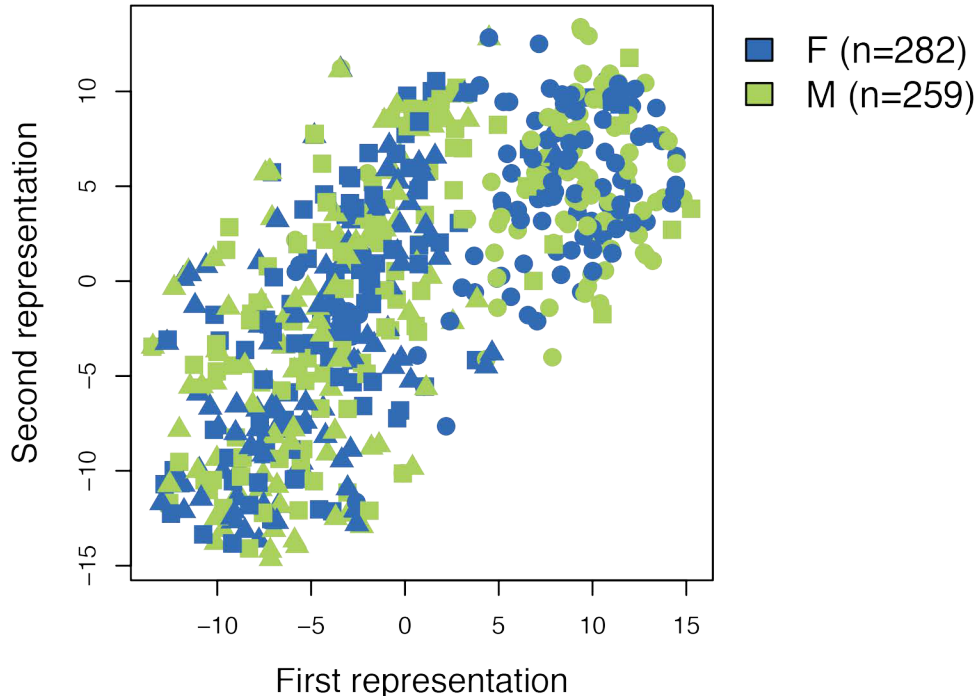

## Age

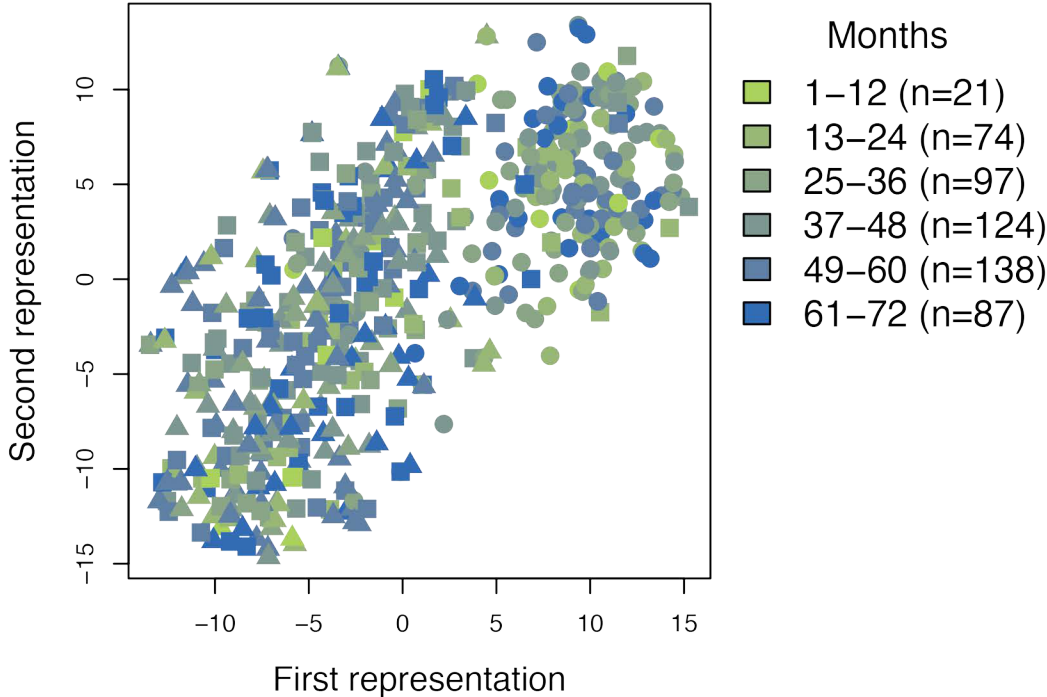

## Nutrition

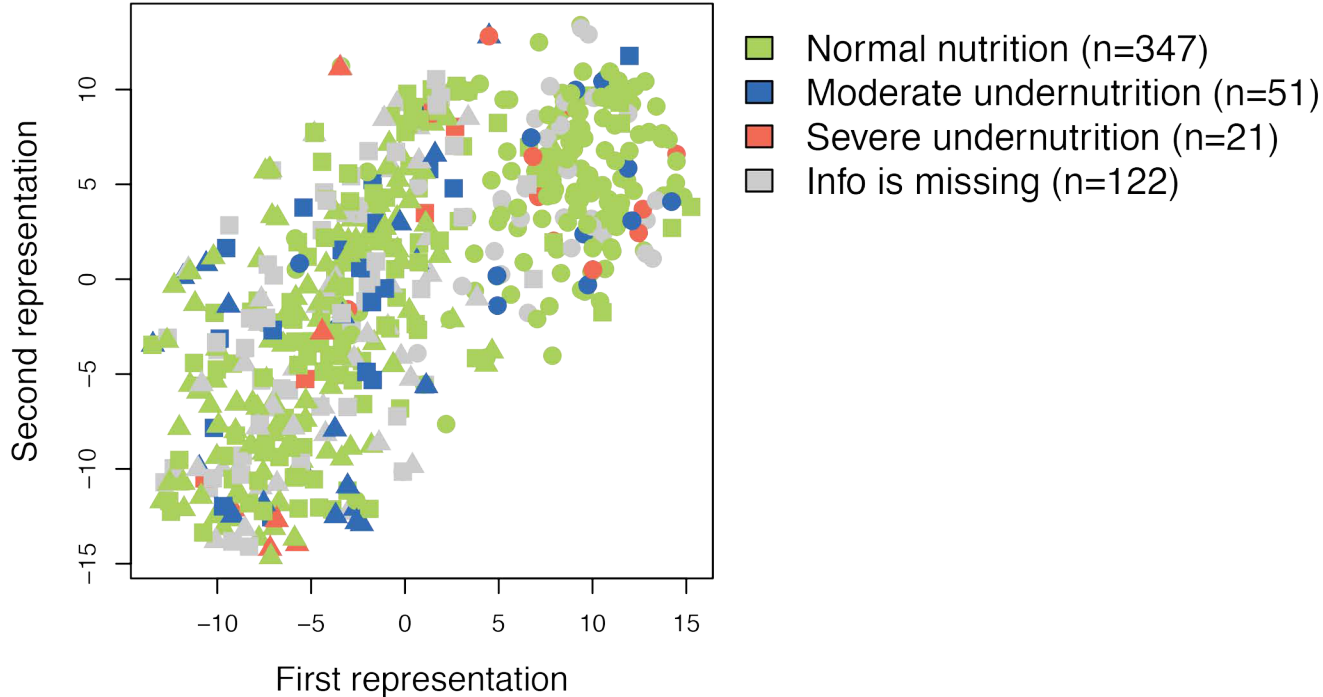

## Body temperature

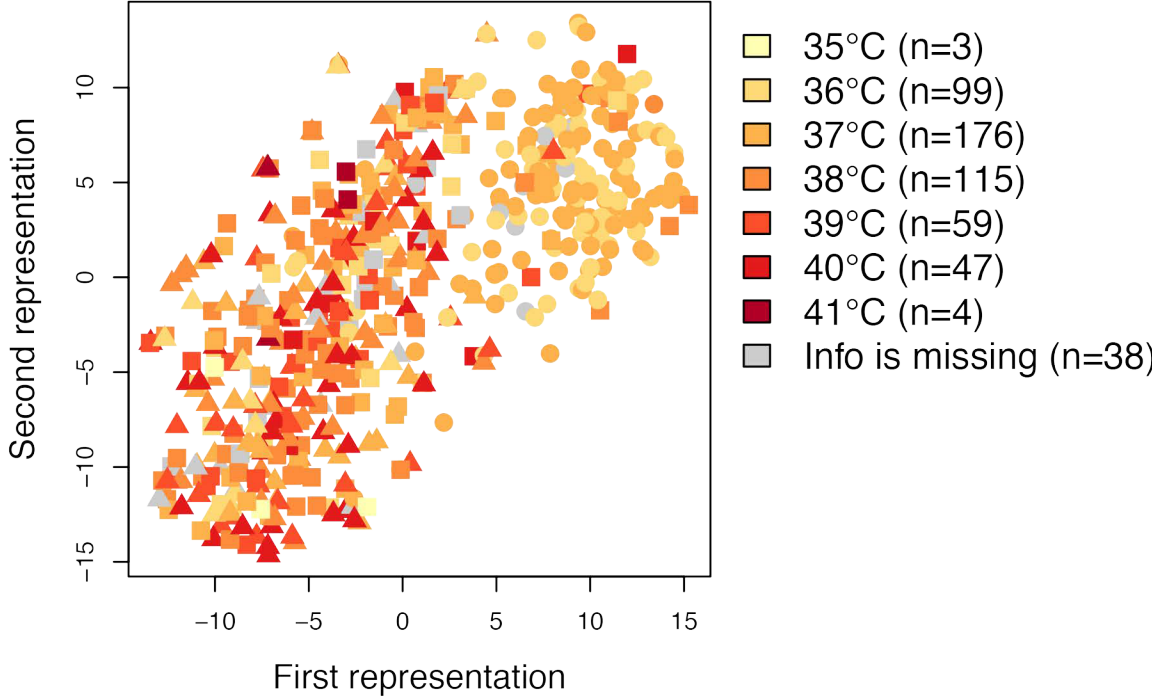

## Signs of dehydration

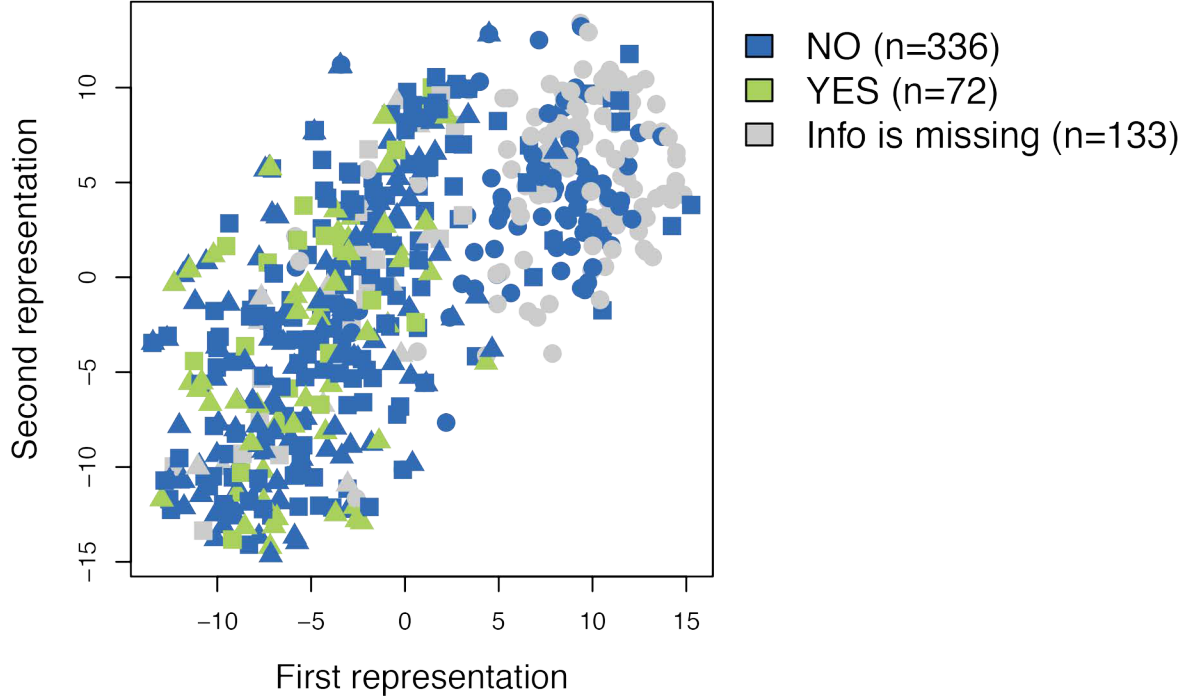

● CONTROLS (n=178)  
 ■ MILD (n=183)  
 ▲ SEVERE (n=180)
