# Supplementary material for: Levels of human proteins in plasma associated with acute paediatric malaria
Source: Springer Nature journal article supplement (doi:10.1186/s12936-018-2576-y), 2018-11-15
Supplement: MOESM10 [file 16273274]

Additional file 10. Information about proteins with divergent levels between febrile convulsion compared to cerebral malaria patients

## ANK1

Ankyrin 1  
Antibody: HPA004842

Intensities per sample group

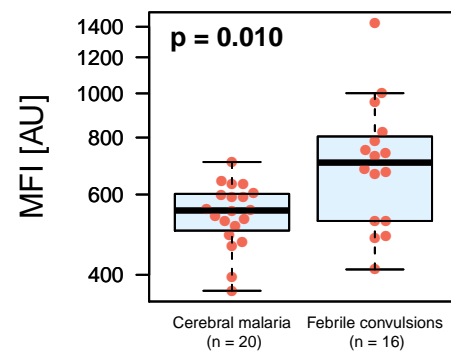

Correlation between experiments

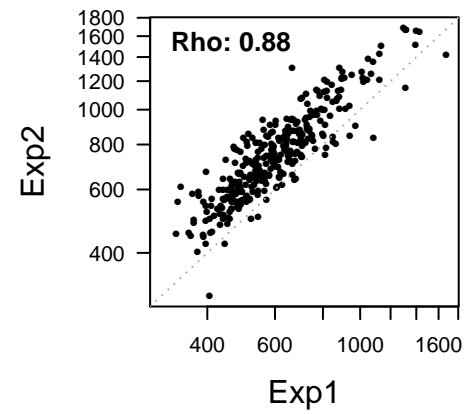

Febrile convulsions vs cerebral malaria

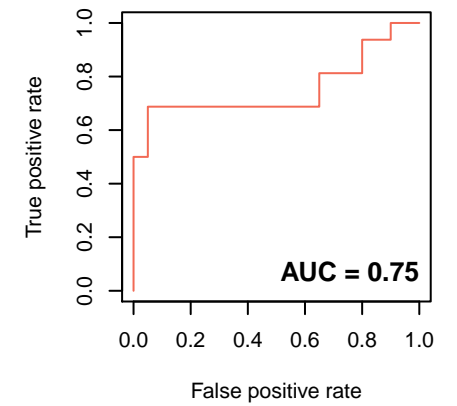

Intensities per sample group

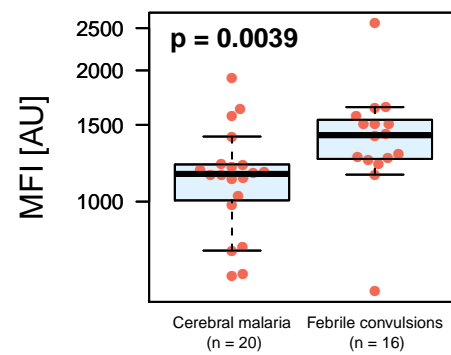

Correlation between experiments

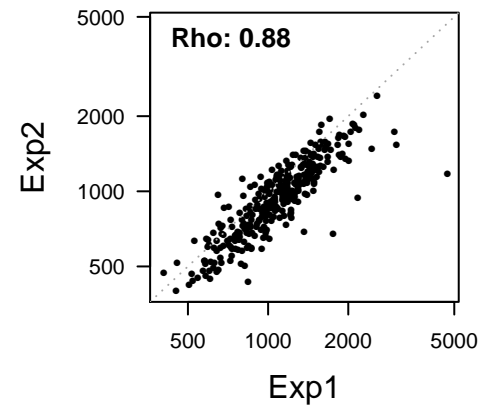

Febrile convulsions vs cerebral malaria

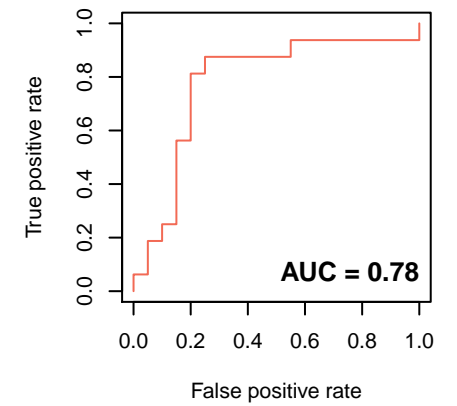

Intensities per sample group

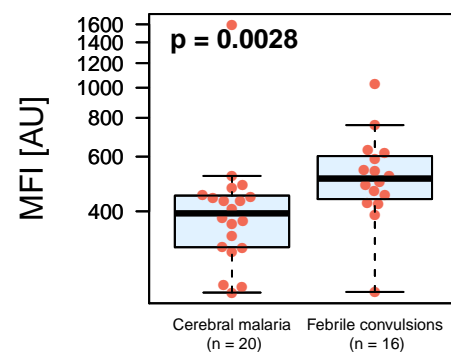

Correlation between experiments

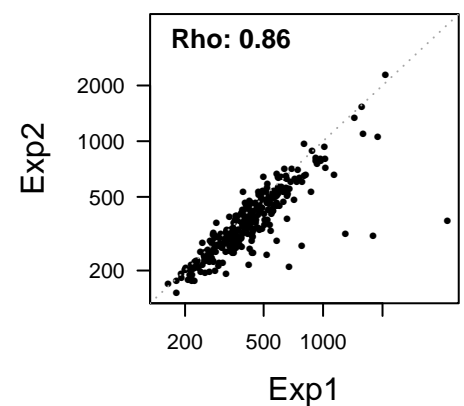

Febrile convulsions vs cerebral malaria

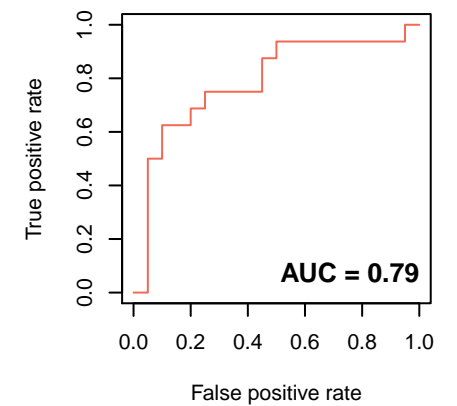

Intensities per sample group

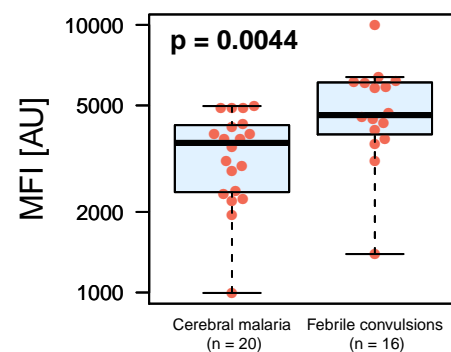

Correlation between experiments

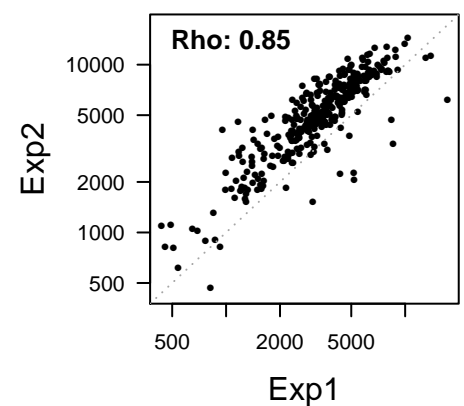

Febrile convulsions vs cerebral malaria

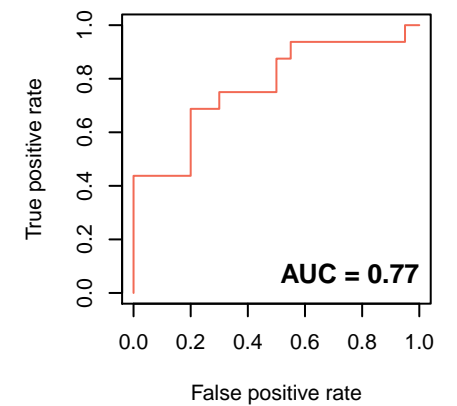

Intensities per sample group

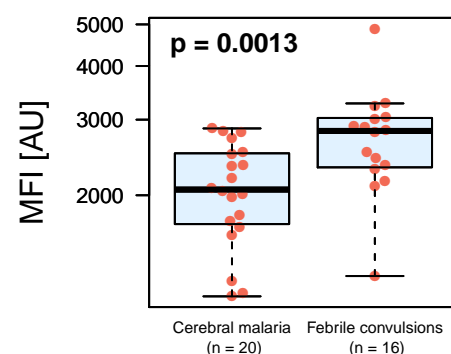

Correlation between experiments

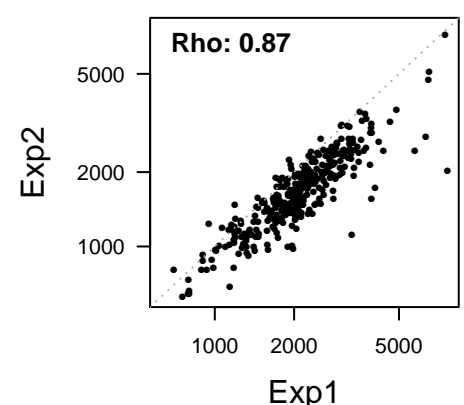

Febrile convulsions vs cerebral malaria

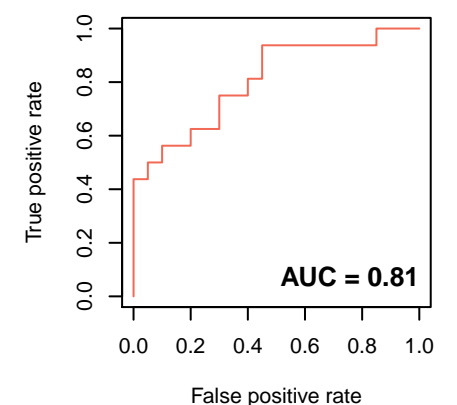

**MPP1**  
Membrane palmitoylated protein 1  
Antibody: HPA076675
