# Supplementary material for: Levels of human proteins in plasma associated with acute paediatric malaria
Source: Springer Nature journal article supplement (doi:10.1186/s12936-018-2576-y), 2018-11-15
Supplement: MOESM11 [file 16273274]

**Additional file 11. Spearman correlation's for antibodies targeting the same protein**

| <b>Gene</b> | <b>UniprotID</b> | <b>Gene description</b>                        | <b>Antibody 1</b> | <b>Antibody 2</b> | <b>Rho</b> |
|-------------|------------------|------------------------------------------------|-------------------|-------------------|------------|
| AGT         | P01019           | Angiotensinogen                                | HPA001557         | MAB3156 R&D       | 0.89       |
| CD14        | P08571           | CD14 molecule                                  | HPA001887         | HPA002127         | 0.88       |
| CD86        | P42081           | CD86 molecule                                  | HPA012286         | HPA012504         | 0.70       |
|             |                  |                                                | HPA012286         | HPA060986         | 0.78       |
|             |                  |                                                | HPA012504         | HPA060986         | 0.70       |
| CRP         | P02741           | C-reactive protein                             | DY1707 R&D        | HPA027396         | 0.73       |
| CSF1        | P09603           | Colony stimulating factor 1                    | HPA022244         | HPA044339         | 0.83       |
|             |                  |                                                | HPA022244         | HPA061864         | 0.87       |
|             |                  |                                                | HPA044339         | HPA061864         | 0.85       |
| ETFB        | P38117           | Electron transfer flavoprotein beta subunit    | HPA018898         | HPA018921         | 0.74       |
| GYPC        | P04921           | Glycophorin C (Gerbich blood group)            | HPA009038         | HPA047565         | 0.76       |
| IGFBP1      | P08833           | Insulin like growth factor binding protein 1   | DY871 R&D         | HPA046972         | 0.88       |
|             |                  |                                                | DY871 R&D         | MAB675 R&D        | 0.98       |
|             |                  |                                                | HPA046972         | MAB675 R&D        | 0.87       |
| LCP1        | P13796           | Lymphocyte cytosolic protein 1                 | HPA019493         | HPA000895         | 0.88       |
| RIPK2       | O43353           | Receptor interacting serine/threonine kinase 2 | HPA015764         | HPA016499         | 0.89       |
| SERPINA3    | P01011           | Serpin family A member 3                       | HPA000893         | HPA002560         | 0.96       |
| VCAM1       | P19320           | Vascular cell adhesion molecule 1              | HPA001618         | HPA034795         | 0.88       |
|             |                  |                                                | HPA034795         | HPA069867         | 0.80       |
|             |                  |                                                | HPA001618         | HPA069867         | 0.88       |
| VWF         | P04275           | von Willebrand factor                          | HPA001815         | HPA002082         | 0.85       |
