# Supplementary material for: Levels of human proteins in plasma associated with acute paediatric malaria
Source: Springer Nature journal article supplement (doi:10.1186/s12936-018-2576-y), 2018-11-15

# Additional file 12. Multi-protein signature

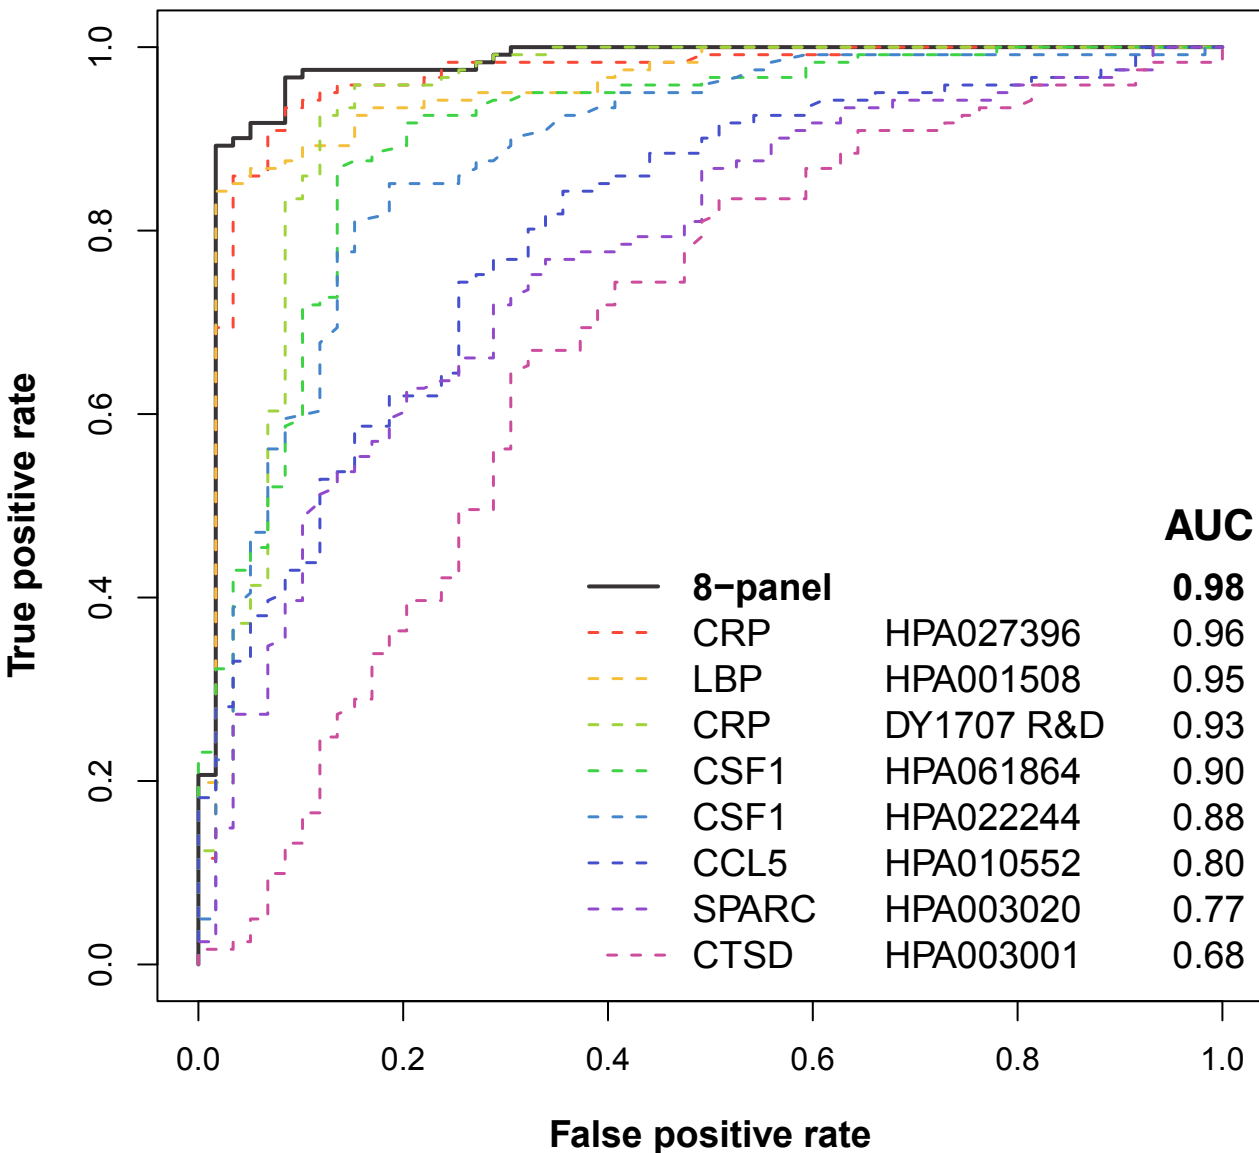

Supplement: MOESM12 [file 16273274]
