# Supplementary material for: Levels of human proteins in plasma associated with acute paediatric malaria
Source: Springer Nature journal article supplement (doi:10.1186/s12936-018-2576-y), 2018-11-15

**Additional file 13. Heatmap over relative protein intensities between cases with mild and severe malaria**

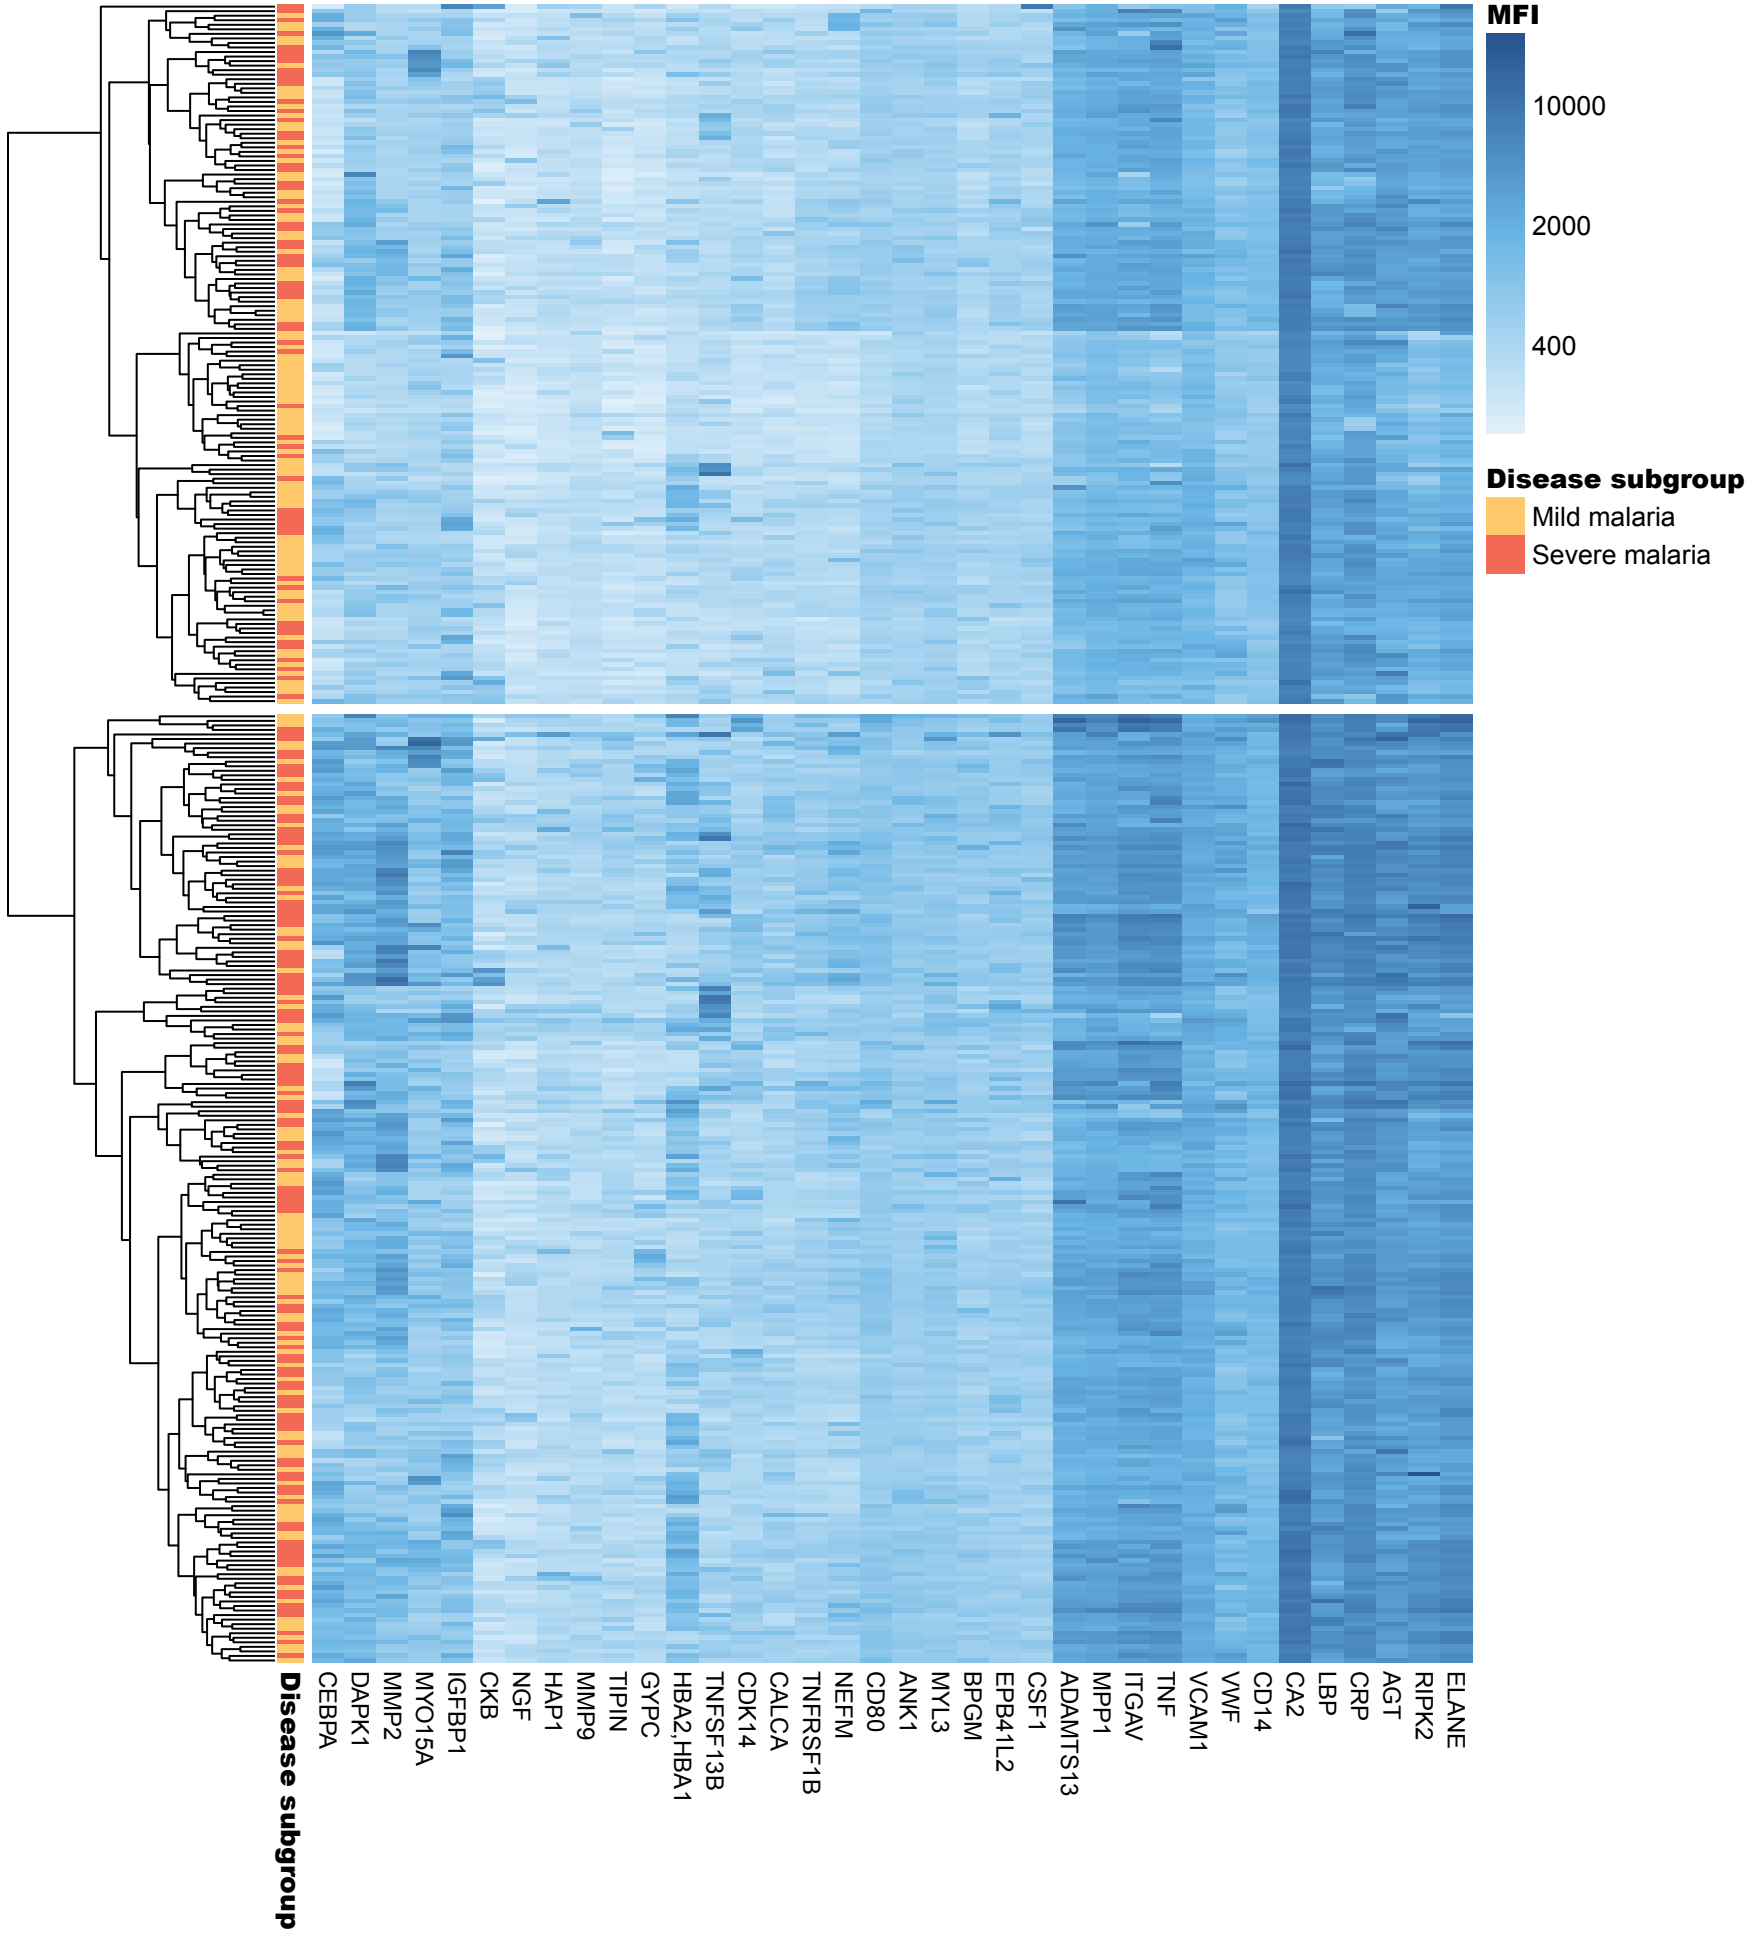

Supplement: MOESM13 [file 16273274]
